# Supplementary material for: Circularly polarised luminescence from intramolecular excimer emission of bis-1,8-naphthalimide derivatives
Source: Royal Society of Chemistry journal article supplement (doi:10.1039/d4ob00413b), 2024-01-01
Supplement: d4ob00413b1.pdf [file d4ob00413b1.pdf]

*Electronic Supplementary Information*

Circularly polarised luminescence from intramolecular excimer  
emission of bis-1,8-naphthalimide derivatives

Shiori Eguchi<sup>1</sup>, Mami Naoe<sup>1</sup>, Asako Kageyama<sup>1</sup>, Yoshitane Imai<sup>2</sup>, Norimitsu Tohnai<sup>3</sup>, Shoko Yamazaki<sup>4</sup>, Eiji Nakata<sup>5</sup>, Hiroshi Takashima,<sup>1,\*</sup>

<sup>1</sup>Department of Chemistry, Biology and Environmental Science, Faculty of Science, Nara Women's University, Nara 630-8506, Japan

<sup>2</sup> Department of Applied Chemistry, Faculty of Science and Engineering, Kindai University, Osaka 577-8502, Japan

<sup>3</sup> Department of Applied Chemistry, Graduate School of Engineering, Osaka University, Osaka 565-0871, Japan

<sup>4</sup> Department of Chemistry, Nara University of Education, Nara 630-8528, Japan

<sup>5</sup> Institute of Advanced Energy, Kyoto University, Kyoto 611-0011, Japan

**\*Correspondence**

H. Takashima

Department of Chemistry, Biology and Environmental Science, Faculty of Science,  
Nara Women's University, Nara 630-8506, Japan

E-mail: [hiroshi@cc.nara-wu.ac.jp](mailto:hiroshi@cc.nara-wu.ac.jp)

## **Table of contents**

1. Experimental materials
2. Instrumentation
3. Crystallographic data collection and structure determination
4. Computational methods
5. Synthetic methods and characterization
6. UV-vis spectra
7. Fluorescence spectra
8. Fluorescence lifetimes
9. DFT calculations
10. CD spectra
11. CPL spectra
12. Cartesian coordinates and energies of the optimized geometries
13. References

## 1. Experimental materials

1,8-Naphthalic anhydride, *D*-lysine monohydrochloride, *D*-lysine methyl ester dihydrochloride, *L*-norleucine, *D*-norleucine and diisopropylethylamine (DIEA) were from Tokyo Kasei Kogyo Co. *L*-lysine monohydrochloride, *L*-lysine methyl ester dihydrochloride, dehydrated *N,N*-dimethylformamide (DMF), ethyl acetate (AcOEt), dichloromethane (DCM), methanol (MeOH), ethanol (EtOH), tetrahydrofuran (THF), hexane, chloroform, 1,4-dioxane, acetonitrile (MeCN), and Wako Gel C-200 from Fuji Film Wako Pure Chemical Co. were used. KBr was used for IR absorption measurement by Fujifilm Wako Pure Chemicals Co. DMSO-*d*<sub>6</sub> for <sup>1</sup>H NMR spectra and <sup>13</sup>C NMR were used by Fujifilm Wako Pure Chemicals Co. For ESI-MS measurements, methanol for LC/MS from Fujifilm Wako Pure Chemicals Co. was used. Organic membrane filter PTFE (0.5 μm, 25 mm) was used from ADVANTEC.

## 2. Instrumentation

<sup>1</sup>H NMR spectra (400 MHz) and <sup>13</sup>C NMR (100 MHz) in solution were recorded on a JEOL JNM-AL400 FT-NMR. <sup>1</sup>H NMR chemical shift values are reported in ppm as reference to the internal standard TMS. ESI-Mass spectra were measured with JEOL JMS-T100LC and JMS-T100LP AccuTOF. Fourier transform IR spectra (FTIR) were measured by the KBr tablet method using the JASCO FTIR-6100V spectrophotometer. X-ray crystallographic data were obtained by Rigaku R-Axis-Rapid Imaging Plate diffractometer. Elemental analysis was performed on a J-Science Lab MICRO CORDER JM10 and a Yanaco CHN corder MT-5. UV-vis electronic absorption spectra were measured using a Shimadzu UV-2550 spectrophotometer. The path length was 1 cm. Fluorescence spectrum measurements were performed using a Shimadzu RF-5300PC fluorometer using a 2 mm or a 1 cm quartz cell. The absolute quantum yields were measured by JASCO FP-6600 fluorescence spectrophotometer with an integrating sphere. Time-resolved emission spectra were measured by a single-photon counting method using a Horiba-Jobin Yvon Tempro equipped with a 430 nm cut filter. The instrumental response of the system to the excitation pulsed solid-state LED light source of 330 nm had a time width of about 100 ps and repetition rate about 1 MHz. The lifetimes were evaluated with the software attached to this equipment. All solutions were slowly and carefully purged with N<sub>2</sub> gas through a needle using a 1 cm quartz cell with

a septum cap. CD spectra were measured with Jasco J-720 spectrometers using a 1 cm quartz cell. CPL spectra were recorded on a JASCO CPL-300 spectrometer using a 1 cm quartz cell with two or four scan times.

### **3. Crystallographic data collection and structure determination**

A crystal was mounted in a loop. All measurements were made on a diffractometer using multi-layer mirror monochromated Cu-K $\alpha$  or Mo-K $\alpha$  radiation. The data were collected at a temperature of 293 K using the  $\omega$ - $2\theta$  scan technique to a maximum  $2\theta$  value of 148.9°. Data were collected and processed using CrysAlisPro (Rigaku Oxford Diffraction) [S1]. The structures were solved by direct methods and refined on  $F^2$  by full-matrix least-squares methods, using SHELXL-97 [S2]. The non-hydrogen atoms were refined anisotropically by the full-matrix least-squares method. All hydrogen atoms were isotropically refined using olex2 [S3]. The structure was solved with the olex2solve structure solution program using Charge Flipping and refined with the olex2refine refinement package using Gauss-Newton minimization [S4].

### **4. Computational Methods**

The molecular structure calculations were performed with density functional theory (DFT) using the Gaussian16 program package [S5]. The B3LYP functional [S6-S7] was used with the 6-31+G\* basis set and the polarisable continuum model solvent effect (solvent = CH<sub>3</sub>CN, Chloroform, and methanol) [S8-S10].

## 5. Synthetic methods and characterization

Compounds *D*-LybNI, *L*-LybNI, *D*-LyMebNI, *L*-LyMebNI, *D*-NorNI, and *L*-NorNI were synthesized as the following Schemes S1 and S2.

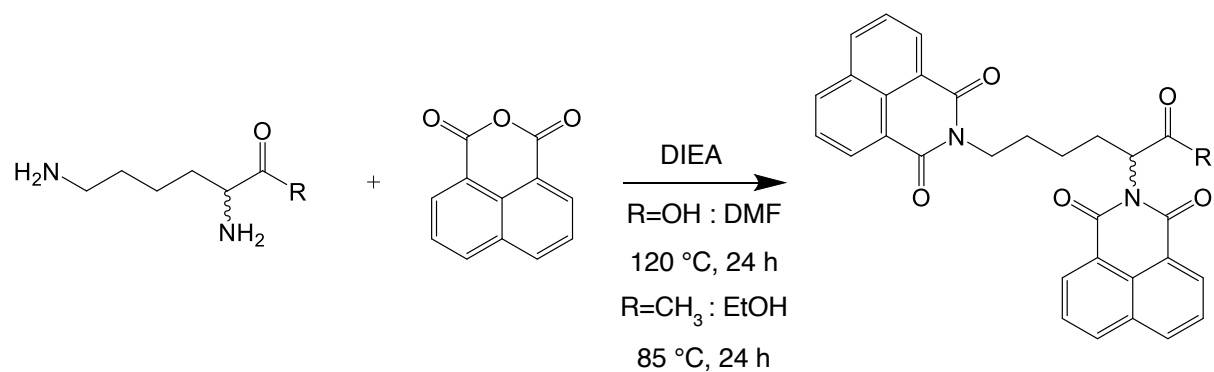

Scheme S1. Syntheses of *D*-LybNI, *L*-LybNI, *D*-LyMebNI, and *L*-LyMebNI used in this study.

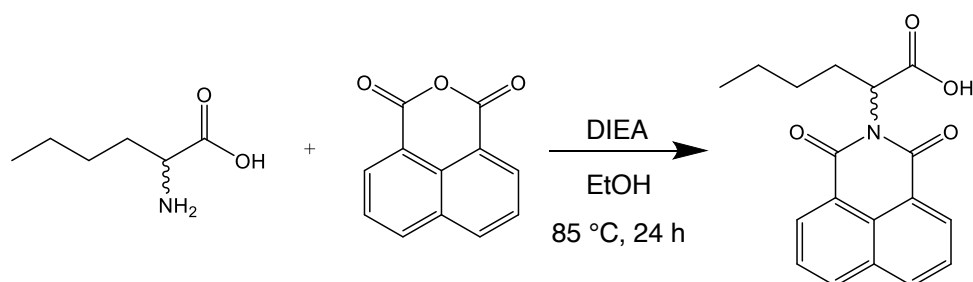

Scheme S2. Syntheses of *D*-NorNI and *L*-NorNI used in this study.

## 5-1. Synthesis of *L*-LybNI

*L*-lysine monohydrochloride 0.174 g ( $9.5 \times 10^{-4}$  mol, 1 eq) was dissolved in 5.0 mL of dehydrated DMF and stirred in a 200 mL flask. DIEA 0.170 mL ( $9.4 \times 10^{-4}$  mol, 1 eq) was then dissolved in 5.0 mL of dehydrated DMF and slowly added dropwise. After stirring at 120 °C for 2 h, 0.421 g ( $2.1 \times 10^{-3}$  mol, 2.2 eq) of 1,8-Naphthalic anhydride was added and the mixture was stirred for 24 h at 120 °C. DMF was then distilled off, and 200 mL of AcOEt was added and stirred at room temperature for 12 h. The filtrate was collected by suction filtration through an organic membrane filter. The solvent was removed under reduced pressure using an evaporator and the resulting solid was washed with DCM. The remaining solid was collected by suction filtration through an organic membrane filter, and the resulting light orange solid was recrystallized from EtOH to give white crystals. Yield 55.2 mg (11%).

$^1\text{H}$  NMR (400 MHz, DMSO- $d_6$ , 298 K) :  $\delta$ /ppm = 8.47 (dd, 2H,  $J = 0.80$  Hz, 8.2 Hz, naphthalene-*H*), 8.40 (dd, 2H,  $J = 0.84$  Hz, 8.2 Hz, naphthalene-*H*), 8.36 (d, 2H,  $J = 7.3$  Hz, naphthalene-*H*), 8.24 (dd, 2H,  $J = 0.96$  Hz, 7.3 Hz, naphthalene-*H*), 7.83 (t, 2H,  $J = 7.8$  Hz, naphthalene-*H*), 7.76 (t, 2H,  $J = 7.8$  Hz, naphthalene-*H*), 5.49 (dd, 1H,  $J = 4.9$  Hz, 9.6 Hz, -CH<sub>2</sub>-CH(NI)-COOH), 3.98 (m, 2H, NI-CH<sub>2</sub>-CH<sub>2</sub>-), 2.19 (m, 2H, -CH<sub>2</sub>-CH<sub>2</sub>-CH(NI)-COOH), 1.66 (m, 2H, NI-CH<sub>2</sub>-CH<sub>2</sub>-CH<sub>2</sub>-), 1.29 (m, 2H, -CH<sub>2</sub>-CH<sub>2</sub>-CH<sub>2</sub>-CH(NI)-).  $^{13}\text{C}$  NMR (100 MHz, DMSO- $d_6$ , 298 K) :  $\delta$ /ppm = 171.25 (-COOH), 163.53 (NI-CO), 163.39 (NI-CO), 134.90 (naphthalene-CH), 134.38 (naphthalene-CH), 131.34-131.43 (naphthalene-CH), 130.70 (naphthalene-CH), 127.39-127.53 (naphthalene-C), 127.28 (naphthalene-C), 122.08 (naphthalene-C), 121.65 (naphthalene-C), 52.85 (-CH(NI)-COOH), 39.52 (NI-CH<sub>2</sub>-), overlapped with solvent), 28.05 (NI-CH<sub>2</sub>-CH<sub>2</sub>-), 27.38 (-CH<sub>2</sub>-CH(NI)-), 23.59 (-CH<sub>2</sub>-CH<sub>2</sub>-CH(NI)-). ESI-MS (CH<sub>3</sub>OH, negative,  $m/z$ ) 505.05 ([M-H]<sup>-</sup> requires 505.15). FTIR (KBr, cm<sup>-1</sup>) : 3458 (Br, m,  $\nu$ C=O), 3212 (Br, m,  $\nu$ O-H), 2961 (w,  $\nu$ C-H), 2920 (w,  $\nu$ C-H), 2862 (w,  $\nu$ C-H), 1745 (s,  $\nu$ C=O), 1692 (s,  $\nu$ C=O), 1654 (s,  $\nu$ C=O), 780 (s,  $\delta$ C-H). Anal. Calcd. for C<sub>30</sub>H<sub>22</sub>N<sub>2</sub>O<sub>6</sub> : C, 71.14; H, 4.38; N, 5.53%. Found : C, 70.92; H, 4.35; N, 5.49%.

**$^1\text{H}$  NMR** (400 MHz,  $\text{DMSO-}d_6$ , 298 K)

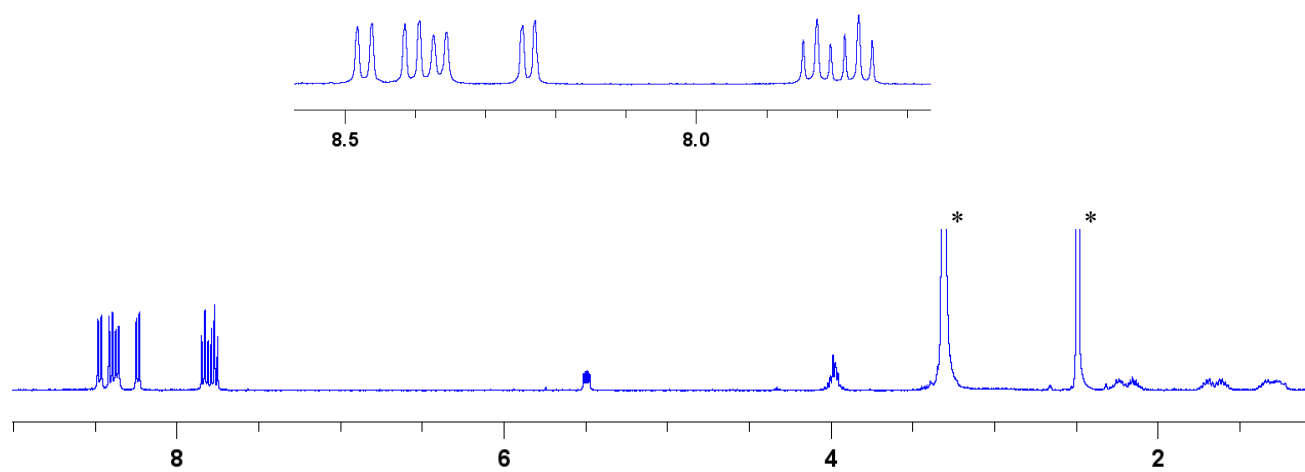

Figure S1.  $^1\text{H}$  NMR (400 MHz) spectrum of *L*-LybNI ( $3.0 \times 10^{-3}$  M) in  $\text{DMSO-}d_6$  at 298 K.

**$^{13}\text{C}$  NMR** (100 MHz,  $\text{DMSO-}d_6$ , 298 K)

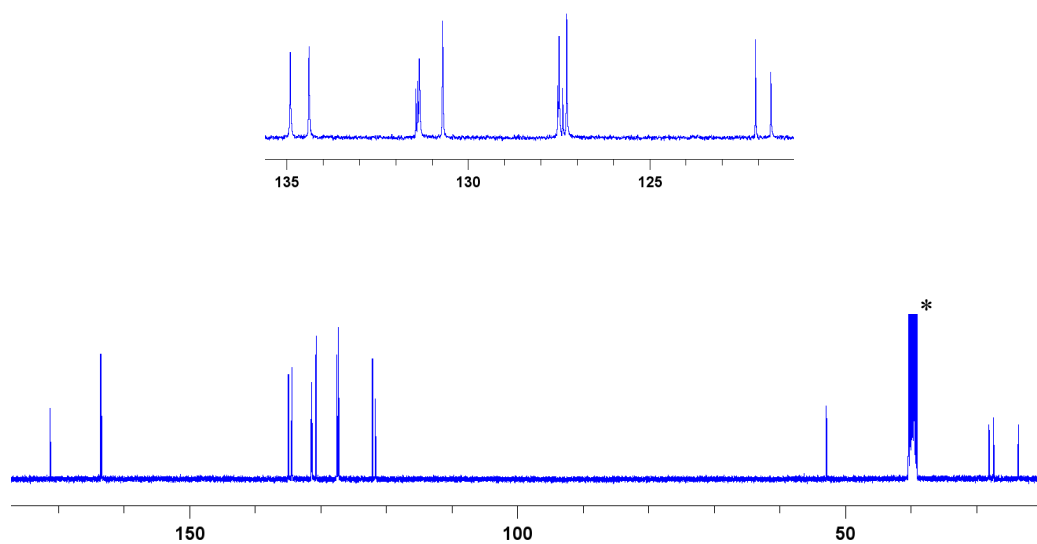

Figure S2.  $^{13}\text{C}$  NMR (100 MHz) spectrum of *L*-LybNI ( $1.7 \times 10^{-2}$  M) in  $\text{DMSO-}d_6$  at 298 K.

ESI-MS (MeOH, negative)

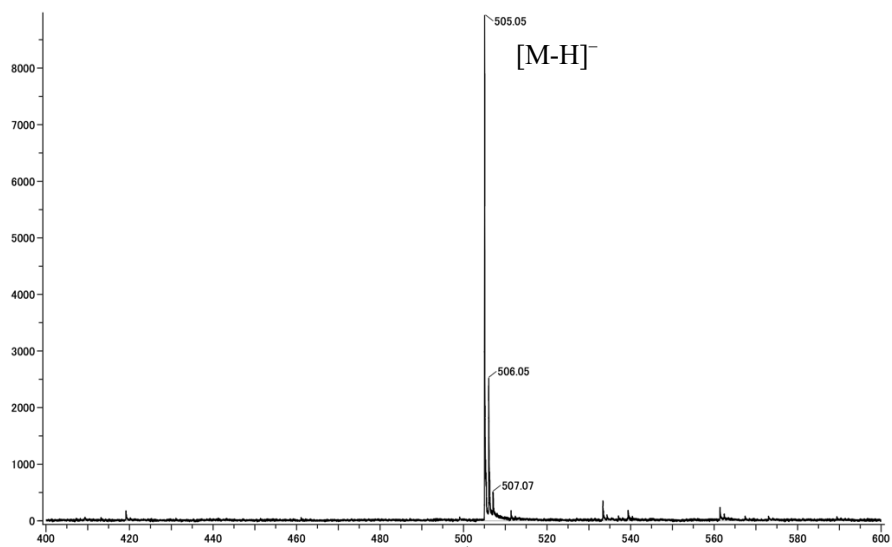

Figure S3. ESI-MS spectrum of *L*-LybNI in MeOH.

FTIR (KBr disk)

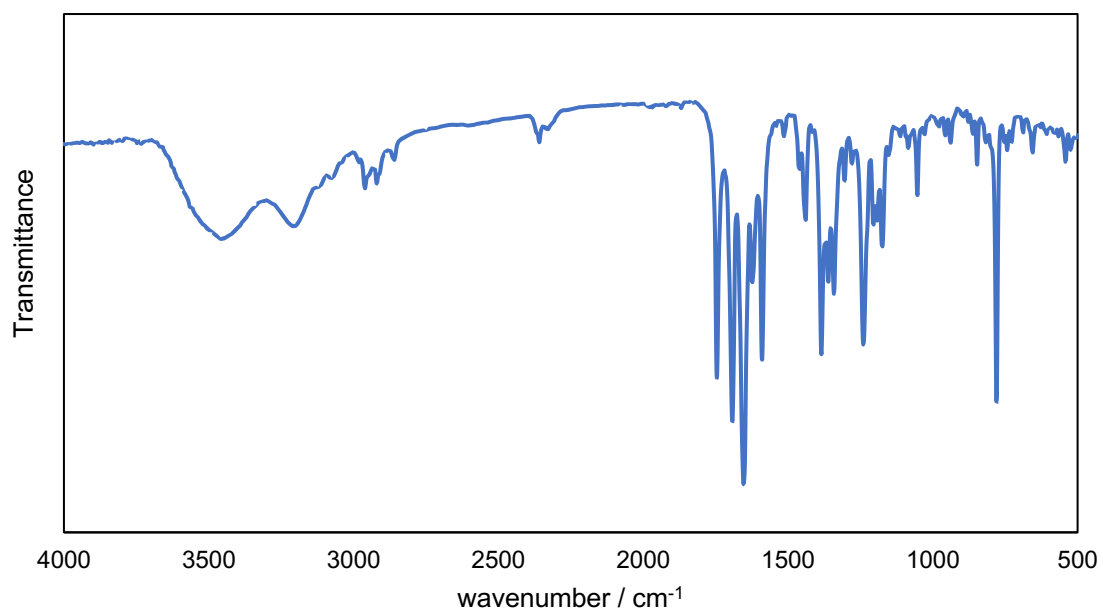

Figure S4. FTIR (KBr disk) spectrum of *L*-LybNI.



## 5-2. Synthesis of *D*-LybNI

*D*-lysine monohydrochloride 0.170 g ( $9.3 \times 10^{-4}$  mol, 1 eq) was dissolved in 5.0 mL of dehydrated DMF and stirred in a 200 mL flask. DIEA 0.170 mL ( $9.4 \times 10^{-4}$  mol, 1 eq) was then dissolved in 5.0 mL of dehydrated DMF and slowly added dropwise. After stirring at 120 °C for 2 h, 0.419 g ( $2.1 \times 10^{-3}$  mol, 2.2 eq) of 1,8-Naphthalic anhydride was added and the mixture was stirred for 24 h at 120 °C. DMF was then distilled off, and 200 mL of AcOEt was added and stirred at room temperature for 12 h. The filtrate was collected by suction filtration through an organic membrane filter. The solvent was removed under reduced pressure using an evaporator and the resulting solid was washed with DCM. The remaining solid was collected by suction filtration through an organic membrane filter, and the resulting light orange solid was recrystallized from EtOH to give white crystals. Yield 82.9 mg (18%).

$^1\text{H}$  NMR (400 MHz, DMSO- $d_6$ , 298 K) :  $\delta$ /ppm = 8.47 (dd, 2H,  $J = 0.80$  Hz, 8.3 Hz, naphthalene-*H*), 8.40 (d, 2H,  $J = 8.3$  Hz, naphthalene-*H*), 8.36 (d, 2H,  $J = 7.2$  Hz, naphthalene-*H*), 8.23 (d, 2H,  $J = 7.2$  Hz, naphthalene-*H*), 7.82 (t, 2H,  $J = 7.4$  Hz, naphthalene-*H*), 7.77 (t, 2H,  $J = 7.4$  Hz, naphthalene-*H*), 5.49 (dd, 1H,  $J = 4.8$  Hz, 9.6 Hz, -CH<sub>2</sub>-CH(NI)-COOH), 3.98 (m, 2H, NI-CH<sub>2</sub>-CH<sub>2</sub>-), 2.16 (m, 2H, -CH<sub>2</sub>-CH<sub>2</sub>-CH(NI)-COOH), 1.65 (m, 2H, NI-CH<sub>2</sub>-CH<sub>2</sub>-CH<sub>2</sub>-), 1.29 (m, 2H, -CH<sub>2</sub>-CH<sub>2</sub>-CH<sub>2</sub>-CH(NI)-).  $^{13}\text{C}$  NMR (100 MHz, DMSO- $d_6$ , 298 K) :  $\delta$ /ppm = 171.27 (-COOH), 163.54 (NI-CO), 163.41 (NI-CO), 134.92 (naphthalene-CH), 134.40 (naphthalene-CH), 131.36-131.45 (naphthalene-CH), 130.70 (naphthalene-CH), 127.51-127.54 (naphthalene-C), 127.30 (naphthalene-C), 122.09 (naphthalene-C), 121.66 (naphthalene-C), 52.85 (-CH(NI)-COOH), 39.52 (NI-CH<sub>2</sub>-), overlapped with solvent), 28.05 (NI-CH<sub>2</sub>-CH<sub>2</sub>-), 27.38 (-CH<sub>2</sub>-CH(NI)-), 23.60 (-CH<sub>2</sub>-CH<sub>2</sub>-CH(NI)-). ESI-MS (CH<sub>3</sub>OH, negative,  $m/z$ ) 505.05 ([M-H]<sup>-</sup> requires 505.15). FTIR (KBr, cm<sup>-1</sup>) : 3466 (Br, m,  $\nu$ C=O), 3200 (Br, m,  $\nu$ O-H), 2961 (w,  $\nu$ C-H), 2920 (w,  $\nu$ C-H), 2862 (w,  $\nu$ C-H), 1745 (s,  $\nu$ C=O), 1692 (s,  $\nu$ C=O), 1655 (s,  $\nu$ C=O), 780 (s,  $\delta$ C-H). Anal. Calcd. for C<sub>30</sub>H<sub>22</sub>N<sub>2</sub>O<sub>6</sub> : C, 71.14; H, 4.38; N, 5.53%. Found : C, 70.94; H, 4.32; N, 5.48%.

**<sup>1</sup>H NMR** (400 MHz, DMSO-*d*<sub>6</sub>, 298 K)

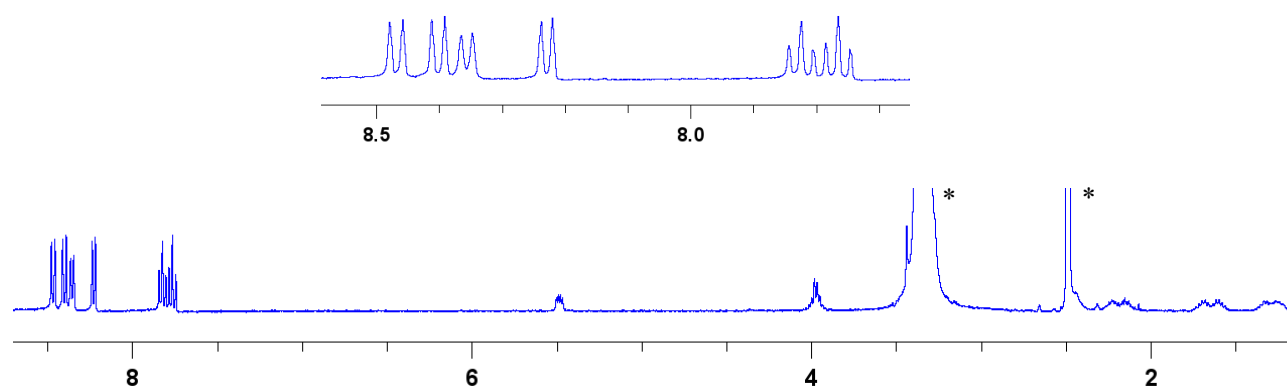

Figure S5. <sup>1</sup>H NMR (400 MHz) spectrum of *D*-LybNI ( $3.1 \times 10^{-3}$  M) in DMSO-*d*<sub>6</sub> at 298 K.

**<sup>13</sup>C NMR** (100 MHz, DMSO-*d*<sub>6</sub>, 298 K)

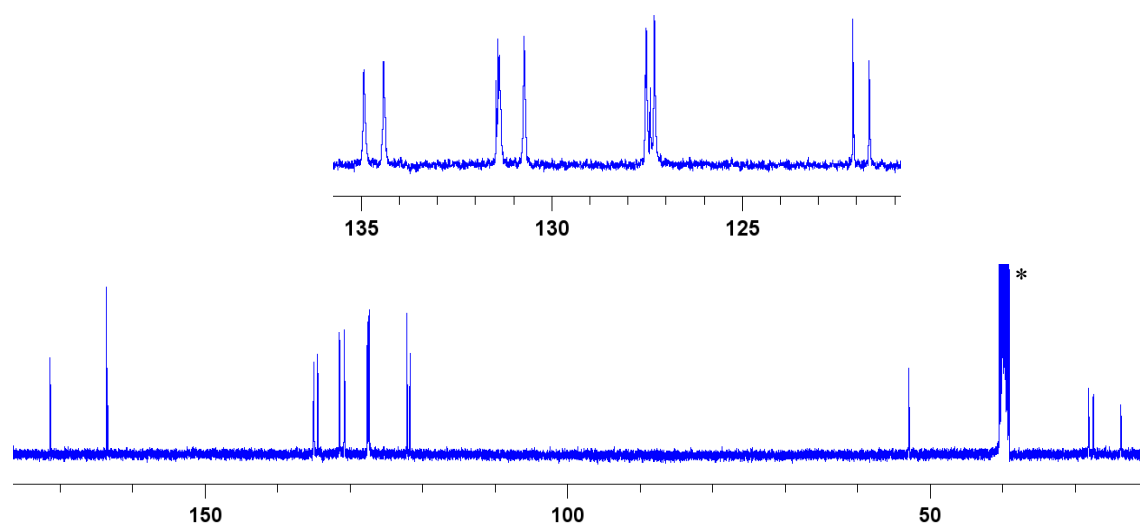

Figure S6. <sup>13</sup>C NMR (100 MHz) spectrum of *D*-LybNI ( $1.7 \times 10^{-2}$  M) in DMSO-*d*<sub>6</sub> at 298 K.

ESI-MS (MeOH, negative)

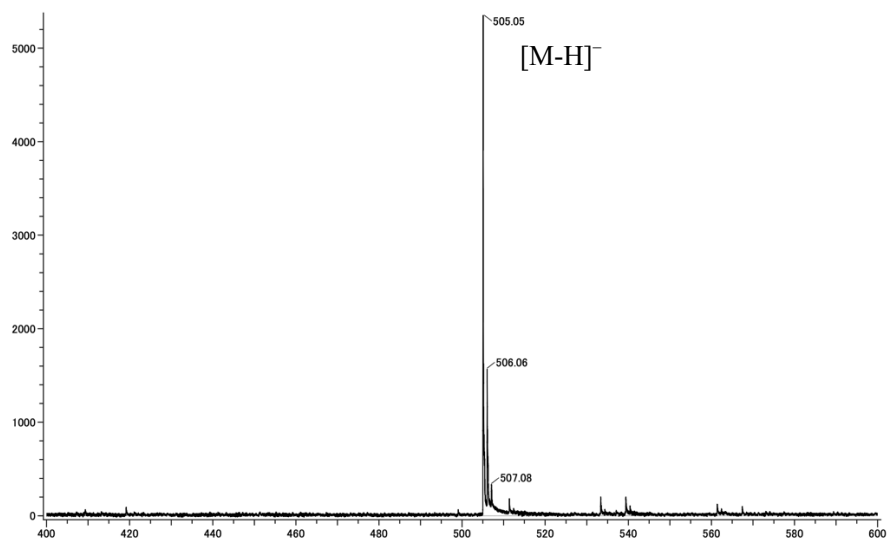

Figure S7. ESI-MS spectrum of *D*-LybNI in MeOH.

FTIR (KBr disk)

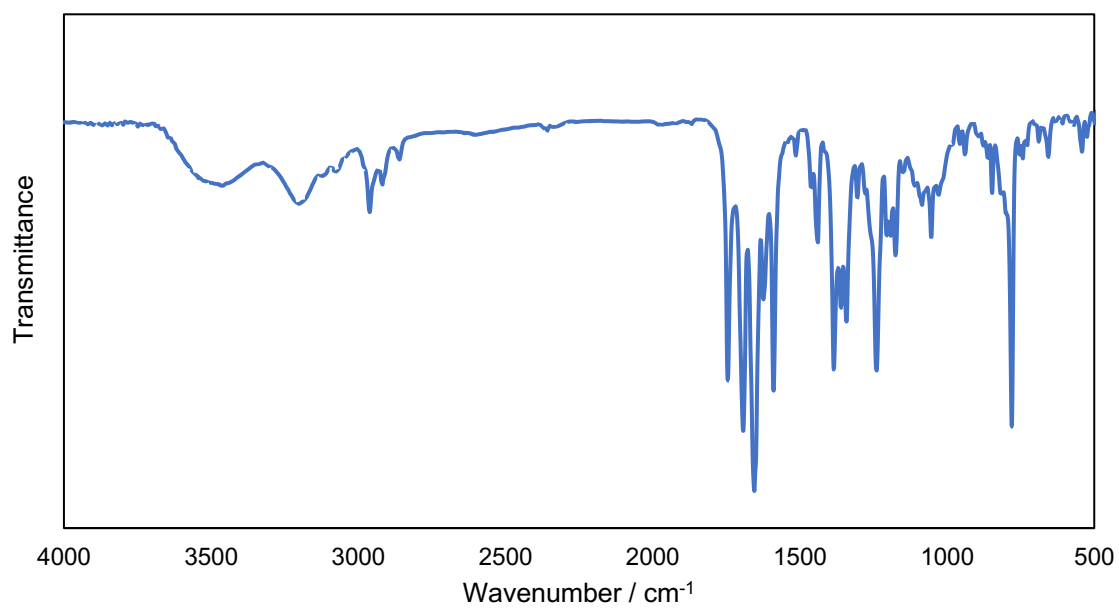

Figure S8. FTIR (KBr disk) spectrum of *D*-LybNI.

### 5-3. Synthesis of *L*-LyMebNI

0.115 g ( $4.9 \times 10^{-4}$  mol) of *L*-lysine methyl ester dihydrochloride was dissolved in 10 mL of EtOH and stirred in a 200 mL flask. DIEA 0.18 mL ( $1.0 \times 10^{-3}$  mol, 2 eq) dissolved in 5.0 mL of EtOH was then added dropwise. After stirring at 85 °C for 2 h, 0.213 g ( $1.1 \times 10^{-3}$  mol, 2.2 eq) of 1,8-Naphthalic anhydride was added and the mixture was stirred for 24 h at 85 °C. The solvent was removed under reduced pressure using an evaporator and dried in vacuum. The product was purified on a column ( $\phi$  3 cm  $\times$  17 cm) using Wako Gel C-200. The eluents were separated using DCM and DCM:MeOH = 200:1 mixture. The solvent was removed under reduced pressure and the desired product was recrystallized from hexane and chloroform to give white crystals. Yield : 0.200 g (78%).

$^1\text{H}$  NMR (400 MHz, DMSO- $d_6$ , 298 K) :  $\delta$ /ppm = 8.49 (d, 2H,  $J$  = 8.2 Hz, naphthalene-*H*), 8.40 (d, 2H,  $J$  = 8.2 Hz, naphthalene-*H*), 8.37 (d, 2H,  $J$  = 7.1 Hz, naphthalene-*H*), 8.21 (d, 2H,  $J$  = 7.2 Hz, naphthalene-*H*), 7.82 (t, 2H,  $J$  = 7.9 Hz, naphthalene-*H*), 7.76 (t, 2H,  $J$  = 7.9 Hz, naphthalene-*H*), 5.60 (dd, 1H,  $J$  = 4.8 Hz, 9.6 Hz, -CH<sub>2</sub>-CH(NI)-COOCH<sub>3</sub>), 3.98 (m, 2H, NI-CH<sub>2</sub>-CH<sub>2</sub>-), 3.58 (s, 3H, -COOCH<sub>3</sub>), 2.20 (m, 2H, -CH<sub>2</sub>-CH<sub>2</sub>-CH(NI)-COOCH<sub>3</sub>), 1.65 (m, 2H, NI-CH<sub>2</sub>-CH<sub>2</sub>-CH<sub>2</sub>-), 1.29 (m, 2H, -CH<sub>2</sub>-CH<sub>2</sub>-CH<sub>2</sub>-CH(NI)-).  $^{13}\text{C}$  NMR (100 MHz, DMSO- $d_6$ , 298 K) :  $\delta$ /ppm = 170.30 (-COOCH<sub>3</sub>), 163.57 (NI-CO), 163.39 (NI-CO), 135.11 (naphthalene-CH), 134.43 (naphthalene-CH), 131.41-131.55 (naphthalene-CH), 130.73 (naphthalene-CH), 127.41-127.56 (naphthalene-C), 127.32 (naphthalene-C), 122.09 (naphthalene-C), 121.50 (naphthalene-C), 52.66 (-CH(NI)-COOCH<sub>3</sub>), 52.36 (-COOCH<sub>3</sub>), 39.52 (NI-CH<sub>2</sub>-, overlapped with solvent), 28.01 (NI-CH<sub>2</sub>-CH<sub>2</sub>-), 27.35 (-CH<sub>2</sub>-CH(NI)-), 23.34 (-CH<sub>2</sub>-CH<sub>2</sub>-CH(NI)-). ESI-MS (CH<sub>3</sub>OH, positive,  $m/z$ ) 543.20 ([M+Na]<sup>+</sup> requires 543.16). FTIR (KBr, cm<sup>-1</sup>) : 3448 (Br, m,  $\nu$  C=O), 2955 (w,  $\nu$  C-H), 1740 (s,  $\nu$  C=O), 1696 (s,  $\nu$  C=O), 1657 (s,  $\nu$  C=O), 780 (s,  $\delta$  C-H). Anal. Calcd. for C<sub>31</sub>H<sub>24</sub>N<sub>2</sub>O<sub>6</sub> : C, 71.53; H, 4.55; N, 5.38%. Found : C, 71.45; H, 4.68; N, 5.30%.

**<sup>1</sup>H NMR** (400 MHz, DMSO-*d*<sub>6</sub>, 298 K)

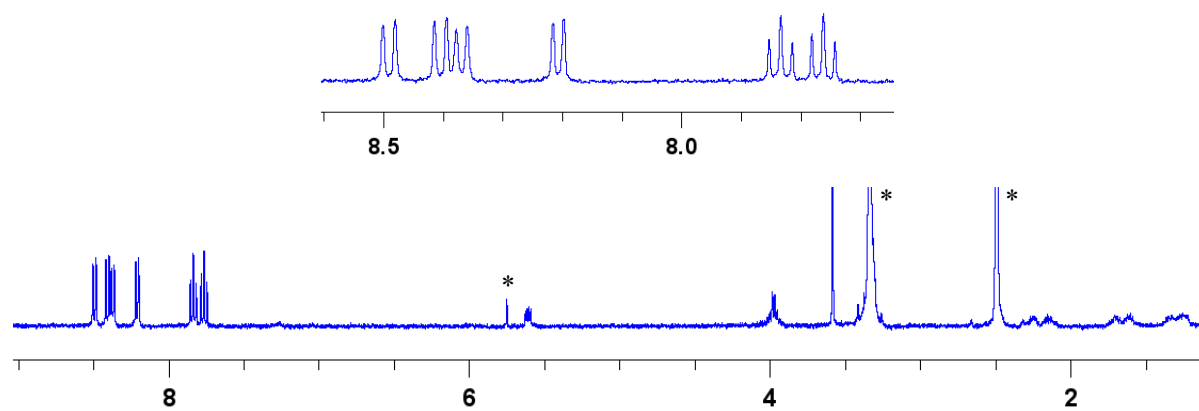

Figure S9. <sup>1</sup>H NMR (400 MHz) spectrum of *L*-LyMebNI ( $3.2 \times 10^{-3}$  M) in DMSO-*d*<sub>6</sub> at 298 K.

**<sup>13</sup>C NMR** (100 MHz, DMSO-*d*<sub>6</sub>, 298 K)

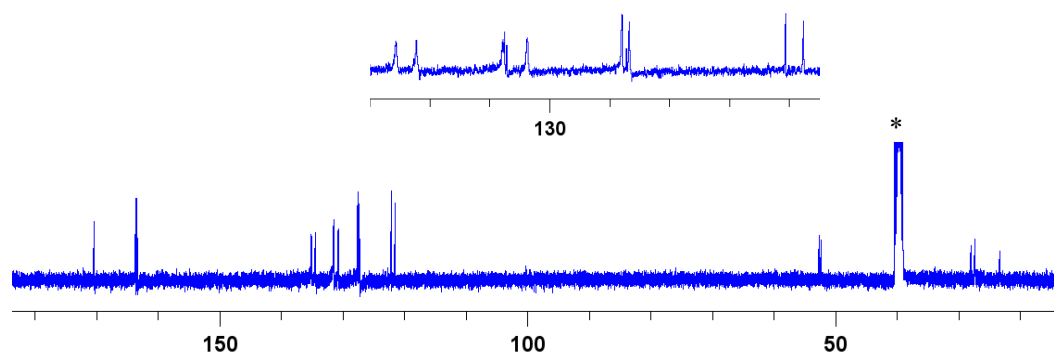

Figure S10. <sup>13</sup>C NMR (100 MHz) spectrum of *L*-LyMebNI ( $1.1 \times 10^{-2}$  M) in DMSO-*d*<sub>6</sub> at 298 K.

ESI-MS (MeOH, positive)

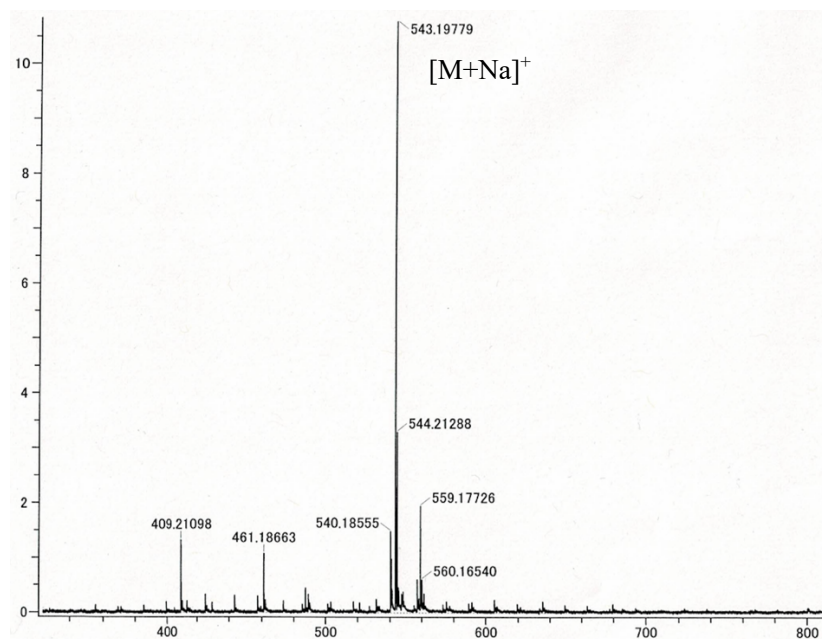

Figure S11. ESI-MS spectrum of *L*-LyMebNI in MeOH.

FTIR (KBr disk)

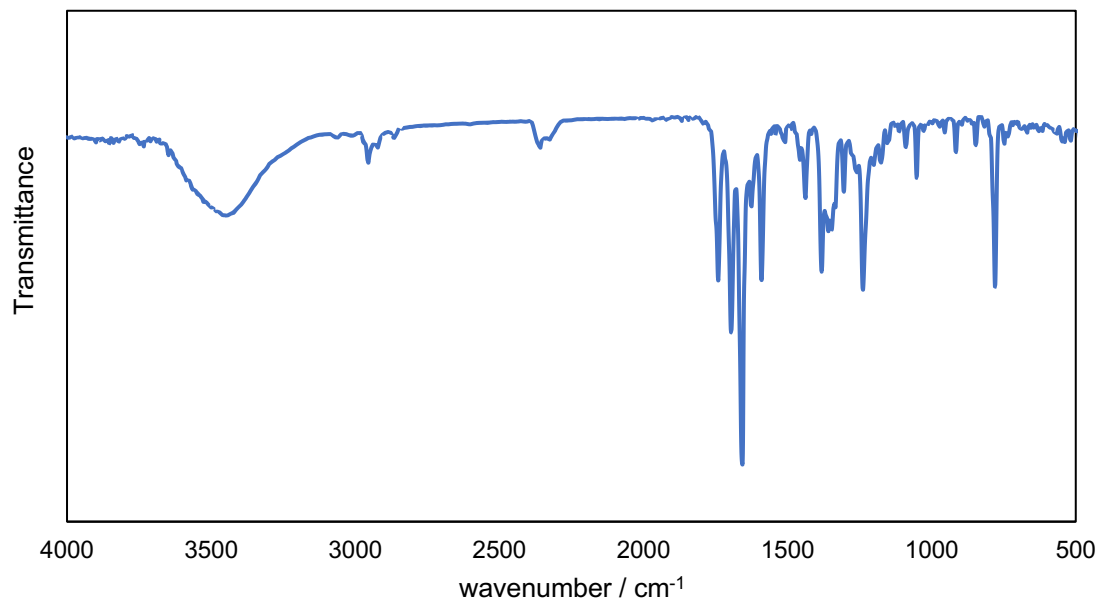

Figure S12. FTIR (KBr disk) spectrum of *L*-LyMebNI.

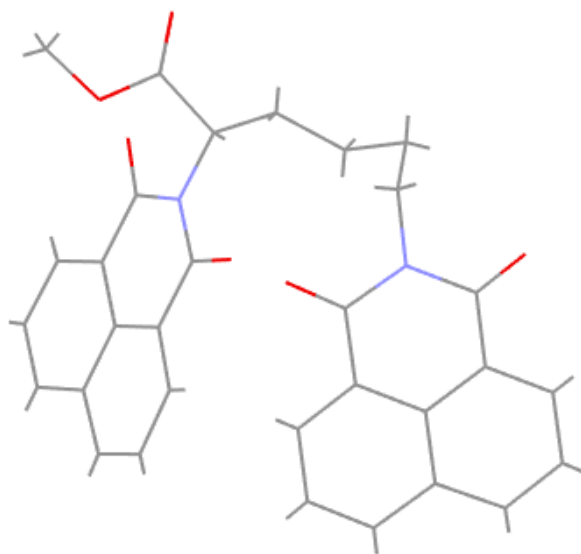

Figure S13. X-ray structure of *L*-LyMebNI.

Table S1. Crystallographic data of *L*-LyMebNI.

|                                            |                                                               |
|--------------------------------------------|---------------------------------------------------------------|
| Formula                                    | C <sub>31</sub> H <sub>24</sub> N <sub>2</sub> O <sub>6</sub> |
| Formula Weight                             | 520.52                                                        |
| Crystal System                             | monoclinic                                                    |
| Space group                                | P2 <sub>1</sub>                                               |
| <i>a</i> (Å)                               | 7.4391                                                        |
| <i>b</i> (Å)                               | 15.3129                                                       |
| <i>c</i> (Å)                               | 10.5379                                                       |
| <i>Z</i>                                   | 2                                                             |
| $\lambda$ (CuK $\alpha$ )                  | 1.54184                                                       |
| $2\theta_{\max}$                           | 148.932                                                       |
| $\mu$ (cm <sup>-1</sup> )                  | 0.834                                                         |
| <i>D</i> <sub>c</sub> (Mgm <sup>-3</sup> ) | 1.449                                                         |
| <i>T</i> (K)                               | 293                                                           |
| <i>V</i> (Å <sup>3</sup> )                 | 1193.17                                                       |
| <i>R</i> <sub>1</sub>                      | 0.0521                                                        |
| <i>R</i> <sub>w</sub>                      | 0.1308                                                        |
| GoF                                        | 1.011                                                         |

#### 5-4. Synthesis of *D*-LyMebNI

0.113 g ( $4.9 \times 10^{-4}$  mol) of *D*-lysine methyl ester dihydrochloride was dissolved in 10 mL of EtOH and stirred in a 200 mL flask. DIEA 0.18 mL ( $1.0 \times 10^{-3}$  mol, 2 eq) dissolved in 5.0 mL of EtOH was then added dropwise. After stirring at 85 °C for 2 h, 0.214 g ( $1.1 \times 10^{-3}$  mol, 2.2 eq) of 1,8-Naphthalic anhydride was added and the mixture was stirred for 24 h at 85 °C. The solvent was removed under reduced pressure using an evaporator and dried in vacuum. The product was purified on a column ( $\phi$  3 cm  $\times$  17 cm) using Wako Gel C-200. The eluents were separated using DCM and DCM:MeOH = 200:1 mixture. The solvent was removed under reduced pressure and the desired product was recrystallized from hexane and chloroform to give white crystals. Yield : 0.200 g (78%).

$^1\text{H}$  NMR (400 MHz, DMSO- $d_6$ , 298 K) :  $\delta$ /ppm = 8.49 (d, 2H,  $J$  = 8.3 Hz, naphthalene-*H*), 8.40 (d, 2H,  $J$  = 8.3 Hz, naphthalene-*H*), 8.37 (d, 2H,  $J$  = 7.2 Hz, naphthalene-*H*), 8.21 (d, 2H,  $J$  = 7.3 Hz, naphthalene-*H*), 1.31 (m, 2H, -CH<sub>2</sub>-CH<sub>2</sub>-CH<sub>2</sub>-CH(NI)-), 7.83 (t, 2H,  $J$  = 7.6 Hz, naphthalene-*H*), 7.76 (t, 2H,  $J$  = 7.4 Hz, naphthalene-*H*), 5.61 (dd, 1H,  $J$  = 4.8 Hz, 9.7 Hz, -CH<sub>2</sub>-CH(NI)-COO CH<sub>3</sub>), 3.98 (m, 2H, NI-CH<sub>2</sub>-CH<sub>2</sub>-), 3.58 (s, 3H, -COOCH<sub>3</sub>), 2.20 (m, 2H, -CH<sub>2</sub>-CH<sub>2</sub>-CH(NI)-COOCH<sub>3</sub>), 1.65 (m, 2H, NI-CH<sub>2</sub>-CH<sub>2</sub>-CH<sub>2</sub>-).  $^{13}\text{C}$  NMR (100 MHz, DMSO- $d_6$ , 298 K) :  $\delta$ /ppm = 170.30 (-COOCH<sub>3</sub>), 163.57 (NI-CO), 163.38 (NI-CO), 135.09 (naphthalene-CH), 134.40 (naphthalene-CH), 131.41-131.53 (naphthalene-CH), 130.71 (naphthalene-CH), 127.41-127.55 (naphthalene-C), 127.31 (naphthalene-C), 122.09 (naphthalene-C), 121.49 (naphthalene-C), 52.66 (-CH(NI)-COOCH<sub>3</sub>), 52.35 (-COOCH<sub>3</sub>), 39.52 (NI-CH<sub>2</sub>-, overlapped with solvent), 28.01 (NI-CH<sub>2</sub>-CH<sub>2</sub>-), 27.35 (-CH<sub>2</sub>-CH(NI)-), 23.33 (-CH<sub>2</sub>-CH<sub>2</sub>-CH(NI)-). ESI-MS (CH<sub>3</sub>OH, positive,  $m/z$ ) 543.23 ([M+Na]<sup>+</sup> requires 543.16). FTIR (KBr, cm<sup>-1</sup>) : 3446 (Br, m,  $\nu$  C=O), 2955 (w,  $\nu$  C-H), 1740 (s,  $\nu$  C=O), 1696 (s,  $\nu$  C=O), 1658 (s,  $\nu$  C=O), 780 (s,  $\delta$  C-H). Anal. Calcd. for C<sub>31</sub>H<sub>24</sub>N<sub>2</sub>O<sub>6</sub> : C, 71.53; H, 4.55; N, 5.38%. Found : C, 71.26; H, 4.59; N, 5.37%.



**<sup>1</sup>H NMR** (400 MHz, DMSO-*d*<sub>6</sub>, 298 K)

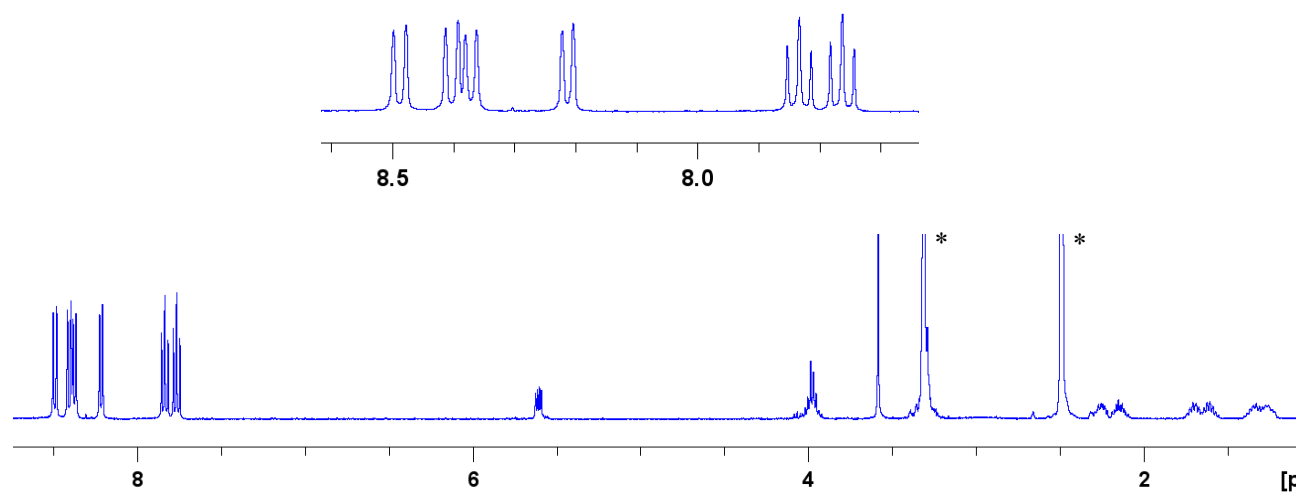

Figure S14. <sup>1</sup>H NMR (400 MHz) spectrum of *D*-LyMebNI ( $3.4 \times 10^{-3}$  M) in DMSO-*d*<sub>6</sub> at 298 K.

**<sup>13</sup>C NMR** (100 MHz, DMSO-*d*<sub>6</sub>, 298 K)

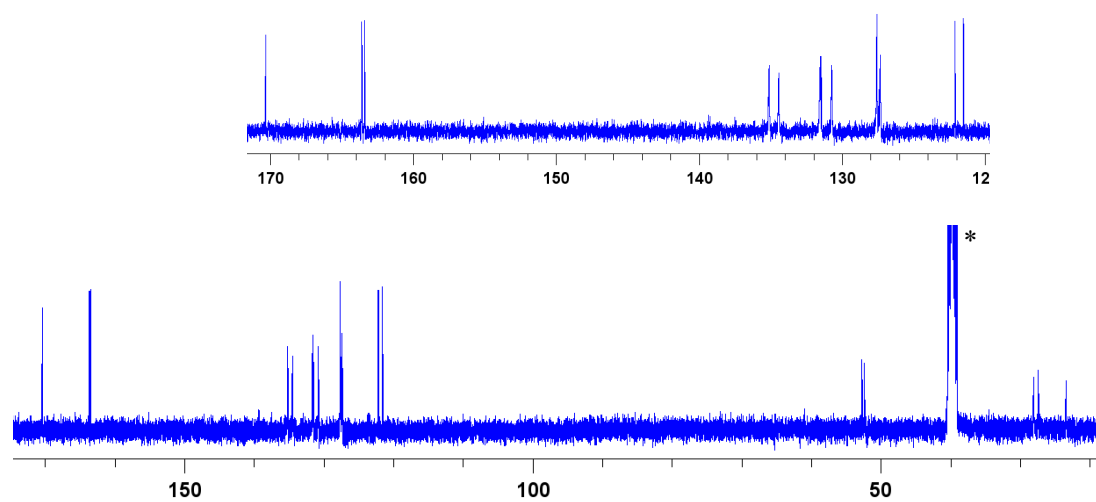

Figure S15. <sup>13</sup>C NMR (100 MHz) spectrum of *D*-LyMebNI ( $1.3 \times 10^{-2}$  M) in DMSO-*d*<sub>6</sub> at 298 K.

ESI-MS (MeOH, positive)

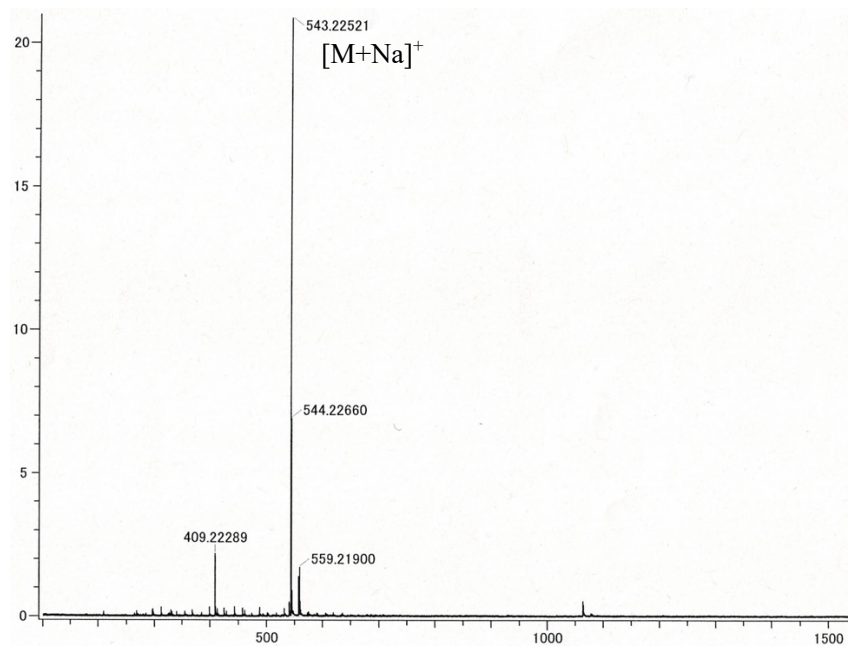

Figure S16. ESI-MS spectrum of *D*-LyMebNI in MeOH.

FTIR (KBr disk)

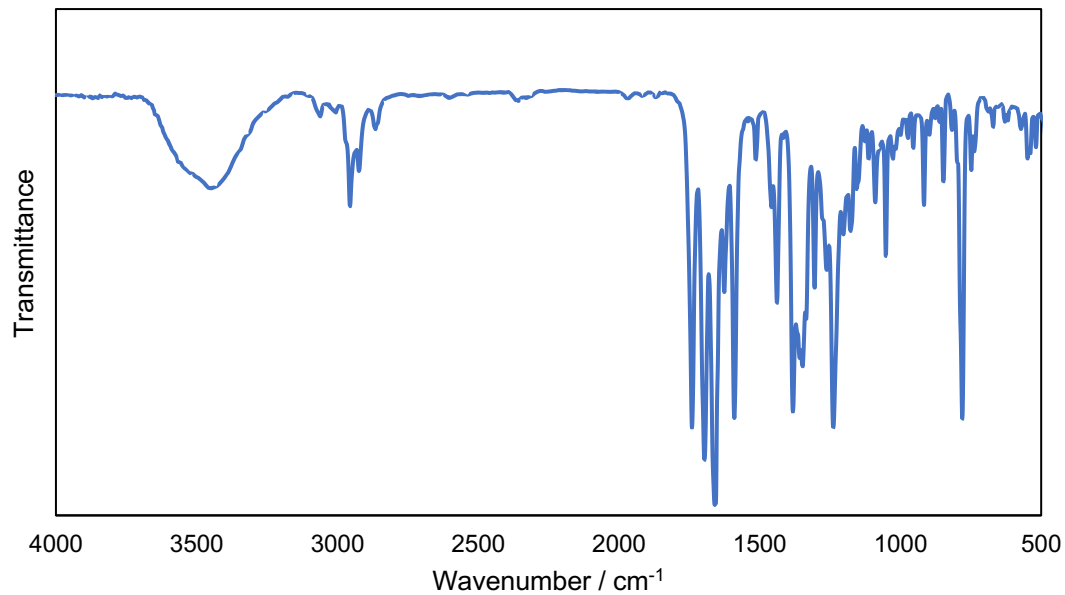

Figure S17. FTIR (KBr disk) spectrum of *D*-LyMebNI.

## 5-5. Synthesis of *L*-NorNI

0.068 g ( $5.2 \times 10^{-4}$  mol) of *L*-norleucine was dissolved in 5.0 mL of EtOH and stirred in a 200 mL flask. DIEA 0.10 mL ( $5.2 \times 10^{-4}$  mol, 1 eq) dissolved in 5.0 mL of EtOH was then added dropwise. After stirring at 85 °C for 2 h, 0.118 g ( $5.9 \times 10^{-4}$  mol, 1.1 eq) of 1,8-Naphthalic anhydride was added and the mixture was stirred for 24 h at 85 °C. The solvent was removed under reduced pressure using an evaporator and dried in vacuum. The product was purified on a column ( $\phi$  3 cm  $\times$  17 cm) using Wako Gel C-200. The eluents were separated using DCM and DCM:MeOH = 100:1 – 10:3 mixtures. The solvent was removed under reduced pressure and the desired product was reprecipitated from DCM and hexane at 4 °C to give white powders. Yield : 0.143 g (89%).

$^1\text{H}$  NMR (400 MHz, DMSO- $d_6$ , 298 K) :  $\delta$ /ppm = 12.75 (br s, 1H, -COOH), 8.52 (d, 2H,  $J$  = 8.0 Hz, naphthalene-*H*), 7.90 (t, 2H,  $J$  = 7.8 Hz, naphthalene-*H*), 5.50 (dd,  $J$  = 4.4 Hz, 9.4 Hz, 1H, -CH<sub>2</sub>-CH(NI)-COOH), 2.13 (m, 2H, -CH-CH<sub>2</sub>-C<sub>3</sub>H<sub>7</sub>), 1.27 (m, 2H, -CH<sub>2</sub>-CH<sub>2</sub>-C<sub>2</sub>H<sub>5</sub>), 1.17 (m, 2H, -CH<sub>2</sub>-CH<sub>2</sub>-CH<sub>3</sub>), 0.79 (t, 3H,  $J$  = 7.1 Hz, -CH<sub>2</sub>-CH<sub>3</sub>).  $^{13}\text{C}$  NMR (100 MHz, DMSO- $d_6$ , 298 K) :  $\delta$ /ppm = 171.42 (-COOH), 163.47 (NI-CO), 135.00 (naphthalene-CH), 131.55 (naphthalene-CH), 127.64 (naphthalene-C), 121.78 (naphthalene-C), 53.23 (-CH(NI)-COOH), 28.46 (-CH<sub>2</sub>-CH<sub>2</sub>-CH<sub>2</sub>-CH<sub>3</sub>), 28.31 (-CH<sub>2</sub>-CH<sub>2</sub>-CH<sub>3</sub>), 22.14 (-CH<sub>2</sub>-CH<sub>3</sub>), 14.04 (-CH<sub>3</sub>). ESI-MS (CH<sub>3</sub>OH, positive,  $m/z$ ) 334.14 ([M+Na]<sup>+</sup> requires 334.10). FTIR (KBr, cm<sup>-1</sup>) : 3446 (Br, m,  $\nu$  C=O), 3068 (Br, m,  $\nu$  O-H), 2960 (m,  $\nu$  C-H), 2929 (m,  $\nu$  C-H), 2872 (m,  $\nu$  C-H), 1702 (s,  $\nu$  C=O), 1665 (s,  $\nu$  C=O), 1589 (s,  $\nu$  C=O), 779 (s,  $\delta$  C-H). Anal. Calcd. for C<sub>18</sub>H<sub>17</sub>NO<sub>4</sub> : C, 69.44; H, 5.50; N, 4.50%. Found : C, 69.23; H, 5.50; N, 4.42%.

**<sup>1</sup>H NMR** (400 MHz, DMSO-*d*<sub>6</sub>, 298 K)

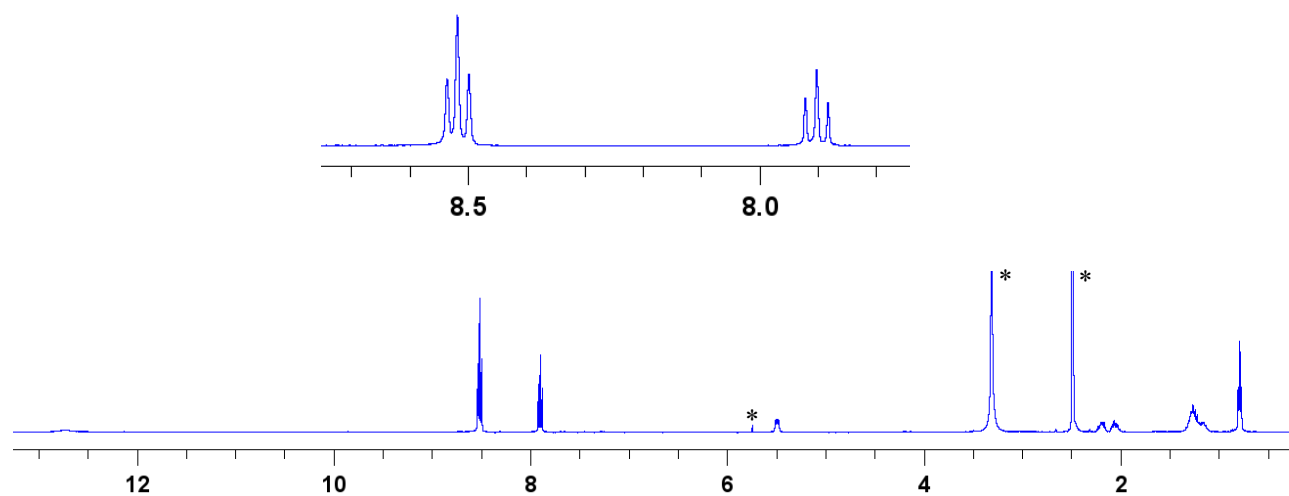

Figure S18. <sup>1</sup>H NMR (400 MHz) spectrum of *L*-NorNI ( $6.1 \times 10^{-3}$  M) in DMSO-*d*<sub>6</sub> at 298 K.

**<sup>13</sup>C NMR** (100 MHz, DMSO-*d*<sub>6</sub>, 298 K)

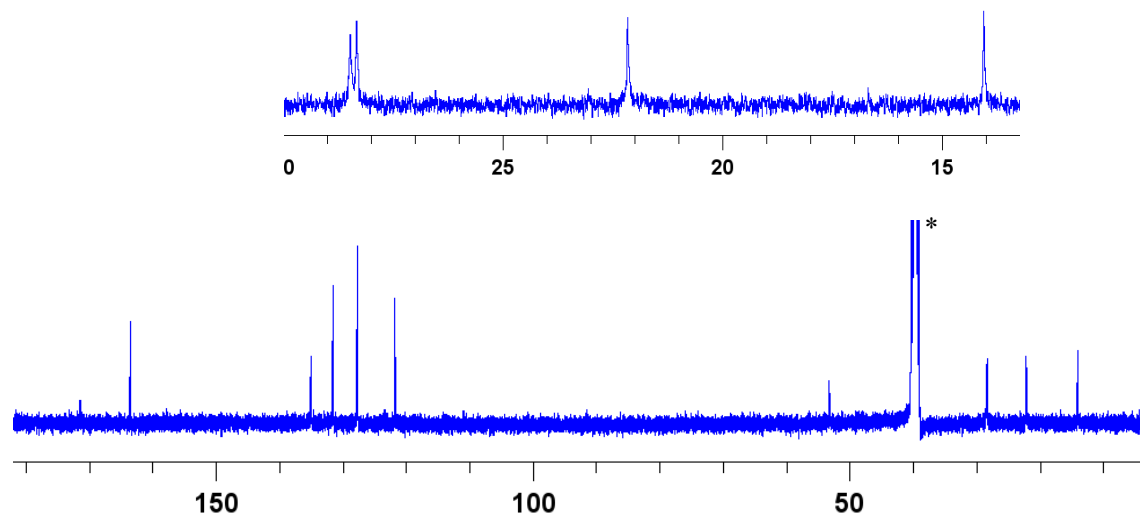

Figure S19. <sup>13</sup>C NMR (100 MHz) spectrum of *L*-NorNI ( $1.1 \times 10^{-2}$  M) in DMSO-*d*<sub>6</sub> at 298 K.

ESI-MS (MeOH, positive)

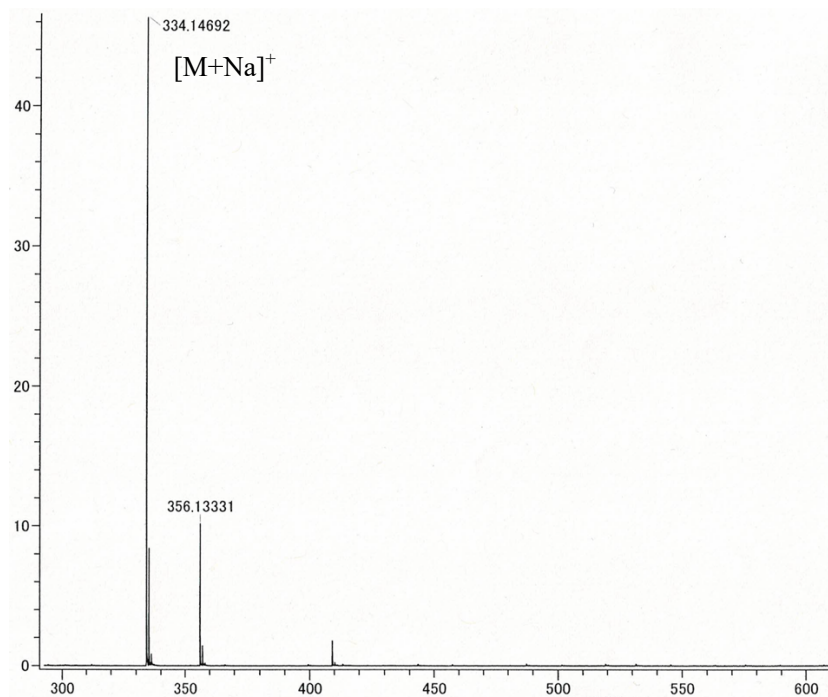

Figure S20. ESI-MS spectrum of *L*-NorNI in MeOH.

FTIR (KBr disk)

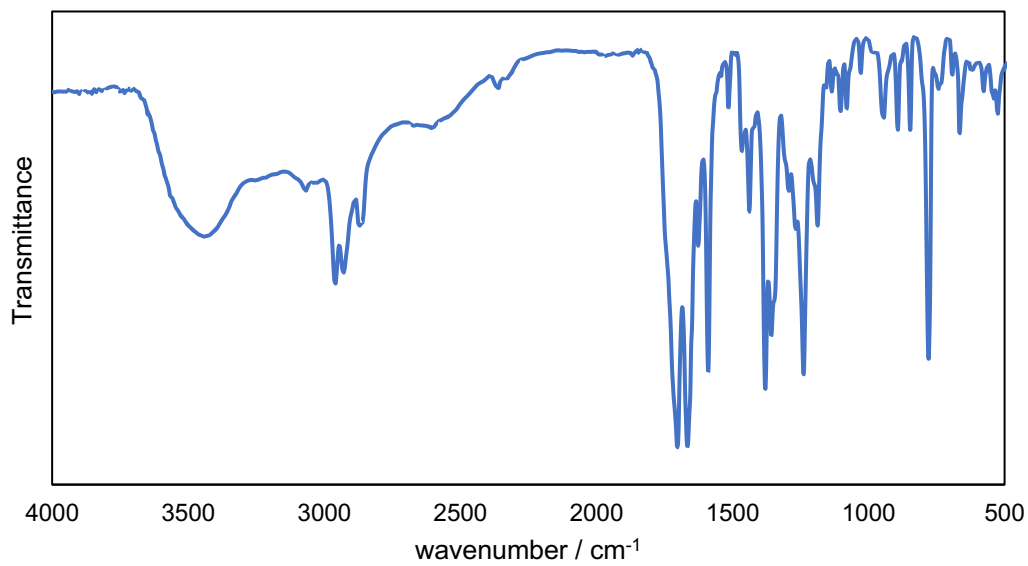

Figure S21. FTIR (KBr disk) spectrum of *L*-NorNI.

## 5-6. Synthesis of *D*-NorNI

0.065 g ( $4.9 \times 10^{-4}$  mol) of *D*-norleucine was dissolved in 10 mL of EtOH and stirred in a 200 mL flask. DIEA 0.10 mL ( $5.2 \times 10^{-4}$  mol, 1.1 eq) dissolved in 5.0 mL of EtOH was then added dropwise. After stirring at 85 °C for 2 h, 0.112 g ( $5.6 \times 10^{-4}$  mol, 1.1 eq) of 1,8-Naphthalic anhydride was added and the mixture was stirred for 24 h at 85 °C. The solvent was removed under reduced pressure using an evaporator and dried in vacuum. The product was purified on a column ( $\varnothing$  3 cm  $\times$  17 cm) using Wako Gel C-200. The eluents were separated using DCM and DCM:MeOH = 100:1 – 10:3 mixtures. The solvent was removed under reduced pressure and the desired product was reprecipitated from DCM and hexane at 4 °C to give white powders. Yield : 0.113 g (73%).

$^1\text{H}$  NMR (400 MHz, DMSO- $d_6$ , 298 K) :  $\delta$ /ppm = 12.75 (br s, 1H, -COOH), 8.52 (d, 2H,  $J$  = 8.0 Hz, naphthalene-*H*), 8.51 (d, 2H,  $J$  = 8.0 Hz, naphthalene-*H*), 7.90 (t, 2H,  $J$  = 7.8 Hz, naphthalene-*H*), 5.50 (dd,  $J$  = 4.4 Hz, 9.4 Hz, 1H, -CH<sub>2</sub>-CH(NI)-COOH), 2.13 (m, 2H, -CH-CH<sub>2</sub>-C<sub>3</sub>H<sub>7</sub>), 1.27 (m, 2H, -CH<sub>2</sub>-CH<sub>2</sub>-C<sub>2</sub>H<sub>5</sub>), 1.17 (m, 2H, -CH<sub>2</sub>-CH<sub>2</sub>-CH<sub>3</sub>), 0.79 (t, 3H,  $J$  = 7.1 Hz, -CH<sub>2</sub>-CH<sub>3</sub>).  $^{13}\text{C}$  NMR (100 MHz, DMSO- $d_6$ , 298 K) :  $\delta$ /ppm = 171.43 (-COOH), 163.46 (NI-CO), 134.99 (naphthalene-*CH*), 131.52 (naphthalene-*CH*), 127.63 (naphthalene-*C*), 121.77 (naphthalene-*C*), 53.22 (-CH(NI)-COOH), 28.45 (-CH<sub>2</sub>-CH<sub>2</sub>-CH<sub>2</sub>-CH<sub>3</sub>), 28.31 (-CH<sub>2</sub>-CH<sub>2</sub>-CH<sub>3</sub>), 22.13 (-CH<sub>2</sub>-CH<sub>3</sub>), 14.02 (-CH<sub>3</sub>). ESI-MS (CH<sub>3</sub>OH, negative,  $m/z$ ) 310.06 ([M-H]<sup>-</sup> requires 310.12). FTIR (KBr, cm<sup>-1</sup>) : 3446 (Br, m,  $\nu$ C=O), 3068 (Br, m,  $\nu$ O-H), 2960 (m,  $\nu$ C-H), 2929 (m,  $\nu$ C-H), 2872 (m,  $\nu$ C-H), 1702 (s,  $\nu$ C=O), 1665 (s,  $\nu$ C=O), 1589 (s,  $\nu$ C=O), 779 (s,  $\delta$  C-H). Anal. Calcd. for C<sub>18</sub>H<sub>17</sub>NO<sub>4</sub> · 0.5 H<sub>2</sub>O : C, 67.48; H, 5.66; N, 4.37%. Found : C, 68.24; H, 5.66; N, 4.37%.

**$^1\text{H}$  NMR** (400 MHz,  $\text{DMSO-}d_6$ , 298 K)

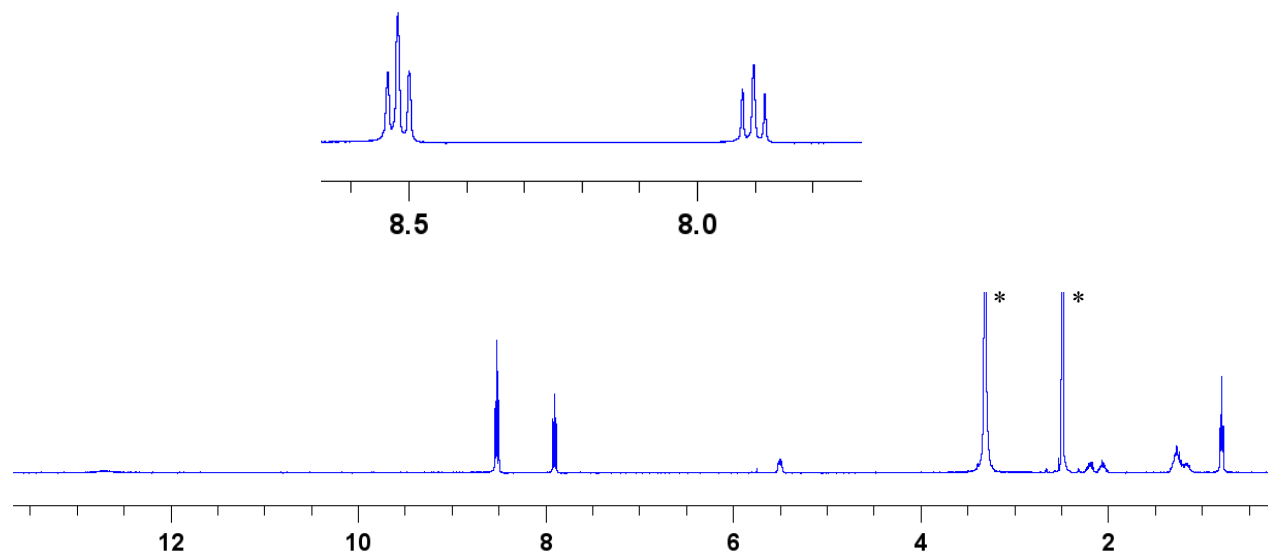

Figure S22.  $^1\text{H}$  NMR (400 MHz) spectrum of *D*-NorNI ( $3.6 \times 10^{-3}$  M) in  $\text{DMSO-}d_6$  at 298 K.

**$^{13}\text{C}$  NMR** (100 MHz,  $\text{DMSO-}d_6$ , 298 K)

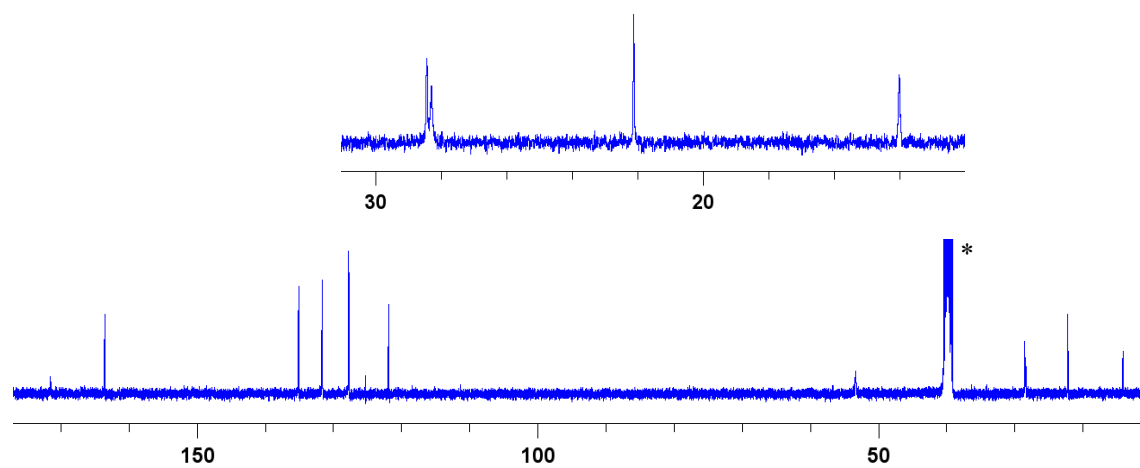

Figure S23.  $^{13}\text{C}$  NMR (100 MHz) spectrum of *D*-NorNI ( $1.3 \times 10^{-2}$  M) in  $\text{DMSO-}d_6$  at 298 K.

ESI-MS (MeOH, negative)

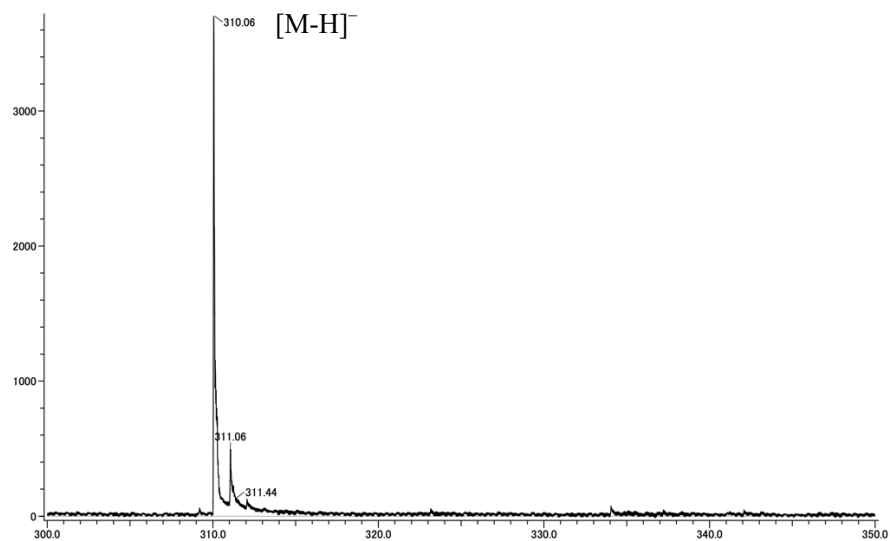

Figure S24. ESI-MS spectrum of *D*-NorNI in MeOH.

FTIR (KBr disk)

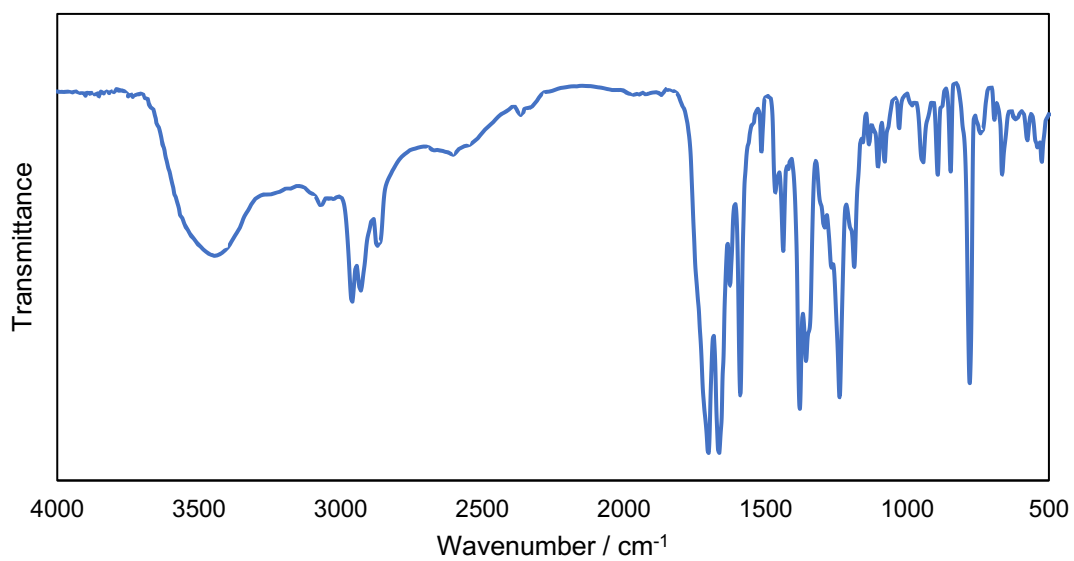

Figure S25. FTIR (KBr disk) spectrum of *D*-NorNI.



## 6. UV-vis spectra

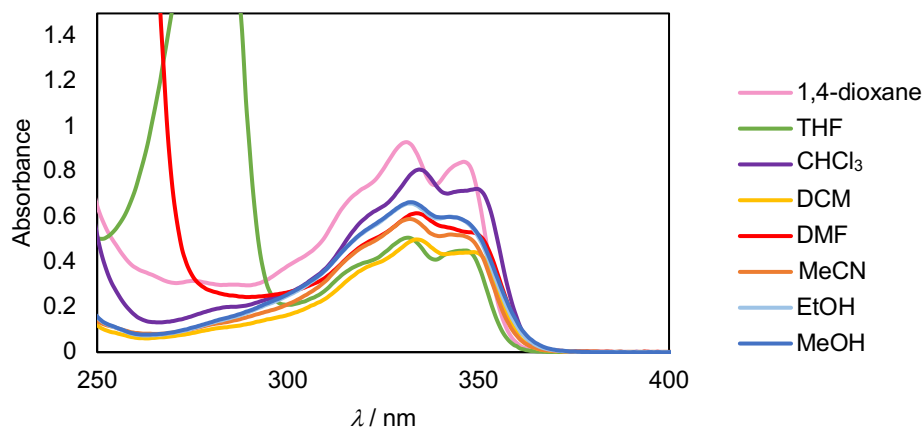

Figure S26. UV-vis spectra of *L*-LybNI in 1,4-dioxane, THF,  $\text{CHCl}_3$ , DCM, DMF, MeCN, EtOH, and MeOH ( $2.5 \times 10^{-5}$  M) at room temperature.

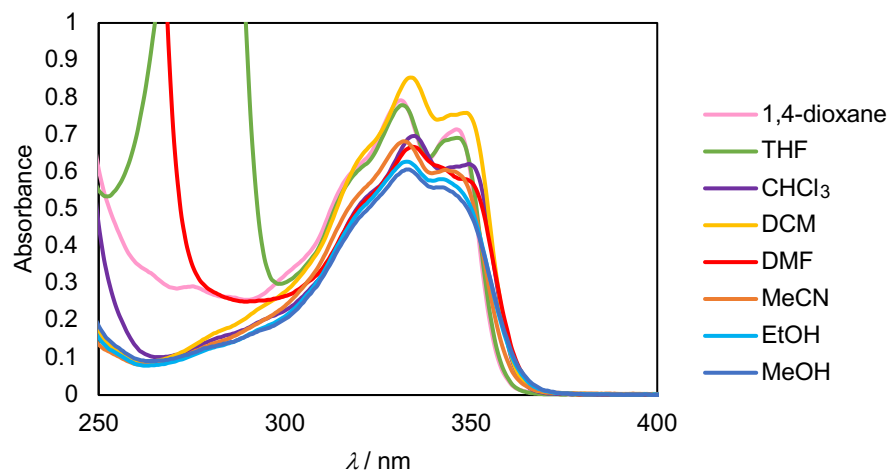

Figure S27. UV-vis spectra of *L*-LyMebNI in 1,4-dioxane, THF,  $\text{CHCl}_3$ , DCM, DMF, MeCN, EtOH, and MeOH ( $2.5 \times 10^{-5}$  M) at room temperature.

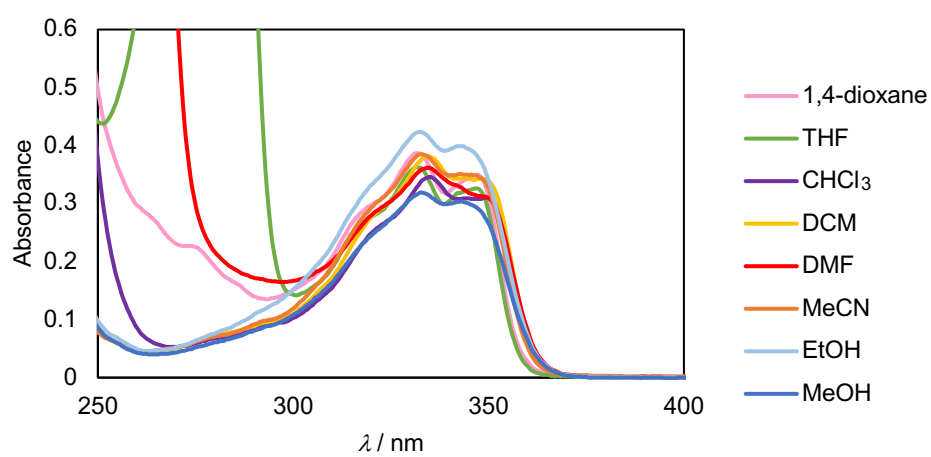

Figure S28. UV-vis spectra of *L*-NorNI in 1,4-dioxane, THF,  $\text{CHCl}_3$ , DCM, DMF, MeCN, EtOH, and MeOH ( $2.5 \times 10^{-5}$  M) at room temperature.

Table S2. Absorption properties of *L*-LyMebNI, *L*-LybNI, and *L*-NorNI in 1,4-Dioxane, THF, CHCl<sub>3</sub>, DCM, DMF, MeCN, EtOH, and MeOH at room temperature.

| Solvent           | $E_T(30)$ | <i>L</i> -LyMebNI            |                                           | <i>L</i> -LybNI              |                                           | <i>L</i> -NorNI              |                                           |
|-------------------|-----------|------------------------------|-------------------------------------------|------------------------------|-------------------------------------------|------------------------------|-------------------------------------------|
|                   |           | $\lambda_{\max} / \text{nm}$ | $\epsilon / \text{M}^{-1} \text{cm}^{-1}$ | $\lambda_{\max} / \text{nm}$ | $\epsilon / \text{M}^{-1} \text{cm}^{-1}$ | $\lambda_{\max} / \text{nm}$ | $\epsilon / \text{M}^{-1} \text{cm}^{-1}$ |
| 1,4-dioxane       | 36.0      | 331                          | $3.2 \times 10^4$                         | 331                          | $3.7 \times 10^4$                         | 332                          | $1.5 \times 10^4$                         |
| THF               | 37.4      | 332                          | $3.1 \times 10^4$                         | 332                          | $2.0 \times 10^4$                         | 332                          | $1.5 \times 10^4$                         |
| CHCl <sub>3</sub> | 39.1      | 335                          | $2.8 \times 10^4$                         | 334                          | $3.2 \times 10^4$                         | 335                          | $1.4 \times 10^4$                         |
| DCM               | 40.7      | 334                          | $3.4 \times 10^4$                         | 334                          | $2.0 \times 10^4$                         | 335                          | $1.5 \times 10^4$                         |
| DMF               | 43.2      | 334                          | $2.7 \times 10^4$                         | 334                          | $2.5 \times 10^4$                         | 334                          | $1.4 \times 10^4$                         |
| ACN               | 45.6      | 332                          | $2.7 \times 10^4$                         | 332                          | $2.4 \times 10^4$                         | 333                          | $1.5 \times 10^4$                         |
| EtOH              | 51.9      | 333                          | $2.5 \times 10^4$                         | 332                          | $2.6 \times 10^4$                         | 333                          | $1.7 \times 10^4$                         |
| MeOH              | 55.4      | 333                          | $2.4 \times 10^4$                         | 332                          | $2.7 \times 10^4$                         | 333                          | $1.3 \times 10^4$                         |

## 7. Fluorescence spectra

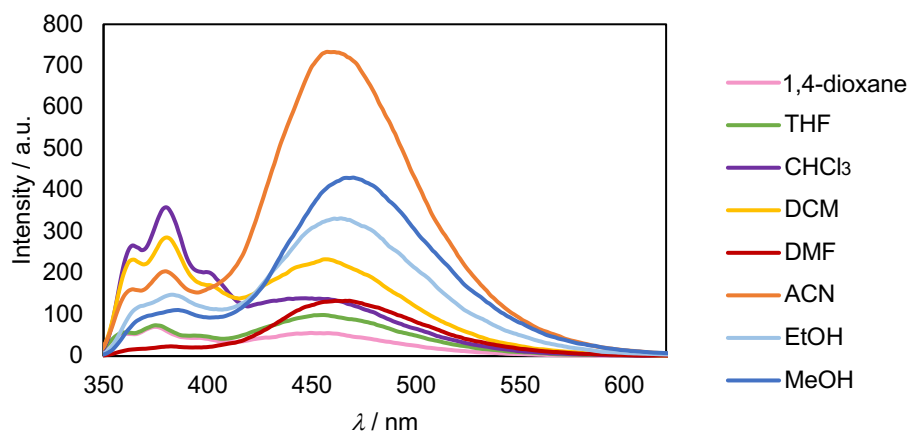

Figure S29. Fluorescence spectra of *L*-LybNI in  $N_2$ -saturated 1,4-dioxane (pink), THF (green),  $CHCl_3$  (purple), DCM (light orange), DMF (red), MeCN (orange), EtOH (light blue), and MeOH (blue) ( $2.5 \times 10^{-5}$  M) at room temperature. The path length was 1 cm.

Table S3. Fluorescence properties of *L*-LybNI in 1,4-dioxane, THF,  $CHCl_3$ , DCM, DMF, MeCN, EtOH, and MeOH at room temperature.

| Solvent     | $\lambda_{em\_monomer} / nm$ | $\lambda_{em\_excimer} / nm$ | $I_{LW}/I_{SW}$ | $\Phi$ |
|-------------|------------------------------|------------------------------|-----------------|--------|
| 1,4-dioxane | 375                          | 450                          | 0.79            | 0.032  |
| THF         | 375                          | 455                          | 1.3             | 0.036  |
| $CHCl_3$    | 380                          | 447                          | 0.39            | 0.068  |
| DCM         | 380                          | 456                          | 0.82            | 0.075  |
| DMF         | 382                          | 468                          | 5.7             | 0.039  |
| MeCN        | 380                          | 457                          | 3.6             | 0.122  |
| EtOH        | 383                          | 464                          | 2.2             | 0.059  |
| MeOH        | 386                          | 470                          | 3.9             | 0.052  |

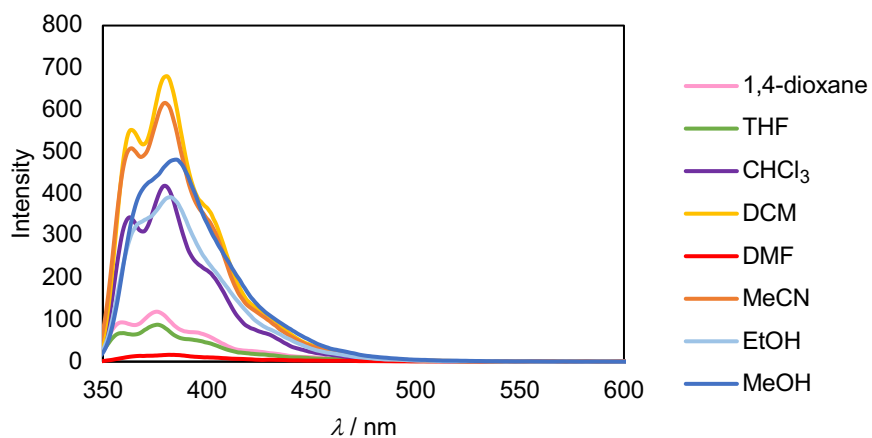

Figure S30. Emission spectra of *L*-NorNI in  $N_2$ -saturated 1,4-dioxane, THF,  $CHCl_3$ , DCM, DMF, MeCN, EtOH, and MeOH ( $2.5 \times 10^{-5}$  M) at room temperature. The path length was 1 cm.

Table S4. Emission properties of *L*-NorNI in 1,4-dioxane, THF,  $CHCl_3$ , DCM, DMF, MeCN, EtOH, and MeOH.

| Solvent     | $\lambda_{em}$ / nm | $\phi_f$ |
|-------------|---------------------|----------|
| 1,4-dioxane | 376                 | 0.007    |
| THF         | 376                 | 0.009    |
| $CHCl_3$    | 380                 | 0.052    |
| DCM         | 381                 | 0.066    |
| DMF         | 382                 | 0.004    |
| MeCN        | 380                 | 0.044    |
| EtOH        | 383                 | 0.048    |
| MeOH        | 385                 | 0.056    |

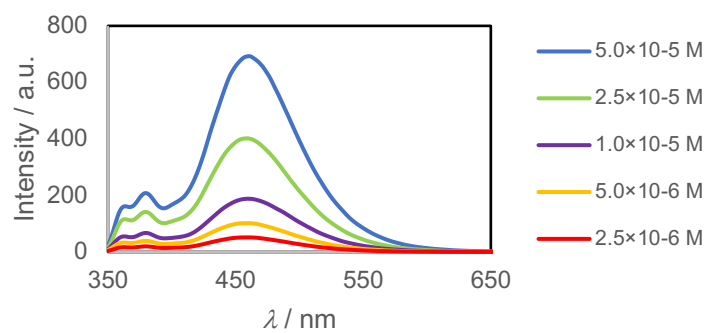

Figure S31. Fluorescence spectra of *L*-LyMebNI in N<sub>2</sub>-saturated MeCN ( $5.0 \times 10^{-5}$ ,  $2.5 \times 10^{-5}$ ,  $1.0 \times 10^{-5}$ ,  $5.0 \times 10^{-6}$ , and  $2.5 \times 10^{-6}$  M) at room temperature ( $\lambda_{\text{ex}} = 332$  nm). The path length was 2 mm.

## 8. Fluorescence lifetimes

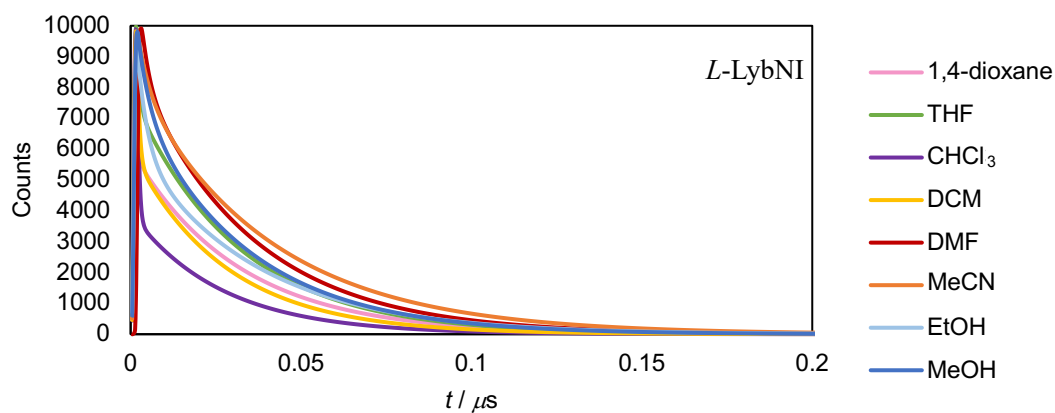

Figure S32. Emission decay of *L*-LybNI in N<sub>2</sub>-saturated 1,4-dioxane, THF, CHCl<sub>3</sub>, DCM, DMF, MeCN, EtOH, and MeOH ( $2.5 \times 10^{-5}$  M) at room temperature ( $\lambda_{\text{ex}} = 330$  nm,  $\lambda_{\text{em}} > 430$  nm).

Table S5. Lifetimes and kinetic parameters of *L*-LybNI in N<sub>2</sub>-saturated 1,4-dioxane, THF, CHCl<sub>3</sub>, DCM, DMF, MeCN, EtOH, and MeOH ( $2.5 \times 10^{-5}$  M) at room temperature ( $\lambda_{\text{ex}} = 330$  nm,  $\lambda_{\text{em}} > 430$  nm).

| Solvent           | Lifetime / ns (A / %) |           |                     | $\chi^2$ | $k_r / 10^6 \text{ s}^{-1}$ | $k_{nr} / 10^7 \text{ s}^{-1}$ |
|-------------------|-----------------------|-----------|---------------------|----------|-----------------------------|--------------------------------|
|                   | $\tau_1$              | $\tau_2$  | $\tau_{\text{ave}}$ |          |                             |                                |
| 1,4-dioxane       | 0.46 (5)              | 31.2 (95) | 29.7                | 1.00     | 1.1                         | 3.3                            |
| THF               | 0.80 (3)              | 30.8 (97) | 29.9                | 1.00     | 1.2                         | 3.2                            |
| CHCl <sub>3</sub> | 0.48 (11)             | 26.4 (89) | 23.5                | 1.00     | 2.9                         | 4.0                            |
| DCM               | 0.64 (5)              | 27.3 (95) | 26.0                | 1.00     | 2.9                         | 3.6                            |
| DMF               | 2.25 (3)              | 33.4 (97) | 32.5                | 1.00     | 1.2                         | 3.0                            |
| MeCN              | 3.38 (2)              | 39.4 (98) | 38.6                | 1.00     | 3.2                         | 2.3                            |
| EtOH              | 2.92 (6)              | 35.3 (94) | 33.3                | 1.00     | 1.8                         | 2.8                            |
| MeOH              | 3.36 (4)              | 32.0 (96) | 30.9                | 1.00     | 1.7                         | 3.0                            |

Table S6. Lifetimes and kinetic parameters of *L*-NorNI in N<sub>2</sub>-saturated 1,4-dioxane, THF, CHCl<sub>3</sub>, DCM, DMF, MeCN, EtOH, and MeOH ( $2.5 \times 10^{-5}$  M) at room temperature ( $\lambda_{\text{ex}} = 330$  nm,  $\lambda_{\text{em}} > 430$  nm).

| Solvent           | Lifetime / ns ( <i>A</i> / %) |           |                     | $\chi^2$ | $k_r / 10^6 \text{ s}^{-1}$ | $k_{\text{nr}} / 10^7 \text{ s}^{-1}$ |
|-------------------|-------------------------------|-----------|---------------------|----------|-----------------------------|---------------------------------------|
|                   | $\tau_1$                      | $\tau_2$  | $\tau_{\text{ave}}$ |          |                             |                                       |
| 1,4-dioxane       | 0.30 (53)                     | 1.43 (47) | 0.83                | 1.00     | 8.4                         | 120                                   |
| THF               | 0.89 (96)                     | 14.6 (4)  | 1.44                | 1.00     | 6.1                         | 69                                    |
| CHCl <sub>3</sub> | 20.8 (4)                      | 0.63 (96) | 1.43                | 1.00     | 36                          | 66                                    |
| DCM               | 0.64 (100)                    |           | 0.64                | 1.00     | 102                         | 146                                   |
| DMF               | 0.34 (67)                     | 22.6 (33) | 7.68                | 1.00     | 0.55                        | 13                                    |
| MeCN              | 0.79 (98)                     | 18.5 (2)  | 1.14                | 1.00     | 39                          | 84                                    |
| EtOH              | 0.78 (98)                     | 25.6 (2)  | 1.27                | 1.00     | 38                          | 75                                    |
| MeOH              | 26.9 (3)                      | 1.00 (97) | 1.77                | 1.00     | 32                          | 53                                    |



## 9. DFT calculations

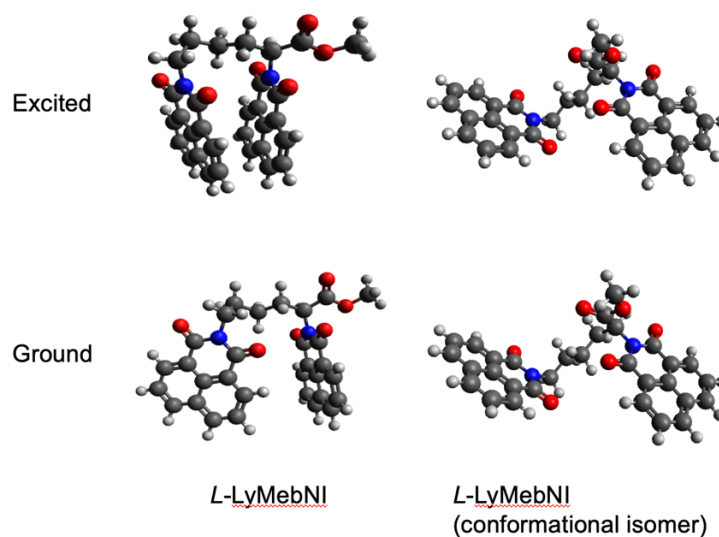

Figure S33. Calculated structures for the ground and excited states of *L*-LyMebNI (left), obtained by optimising the X-ray structure, and its linear conformational isomer (right) with solvent MeCN.

Table S7. Calculated absorption energies in eV, absorption wavelengths, fluorescence energies, and fluorescence wavelengths of *L*-LyMebNI and its linear conformational isomer with solvents CHCl<sub>3</sub>, MeCN, and MeOH.

| Solvent           | <i>L</i> -LyMebNI <sup>a</sup> |                       |              |                       | <i>L</i> -LyMebNI (conformational isomer) |                       |              |                       |
|-------------------|--------------------------------|-----------------------|--------------|-----------------------|-------------------------------------------|-----------------------|--------------|-----------------------|
|                   | absorption                     |                       | fluorescence |                       | absorption                                |                       | fluorescence |                       |
|                   | energy/eV                      | $\lambda_{\max}$ / nm | energy/eV    | $\lambda_{\max}$ / nm | energy/eV                                 | $\lambda_{\max}$ / nm | energy/eV    | $\lambda_{\max}$ / nm |
| CHCl <sub>3</sub> | 3.61                           | 344                   | 2.97         | 417                   | 3.57                                      | 348                   | 3.17         | 391                   |
| MeCN              | 3.59                           | 345                   | 2.91         | 425                   | 3.55                                      | 349                   | 3.17         | 391                   |
| MeOH              | 3.59                           | 345                   | 2.91         | 425                   | 3.56                                      | 349                   | 3.17         | 391                   |

<sup>a</sup> The ground state geometries were obtained by optimizing the X-ray structure.

## 10. CD spectra

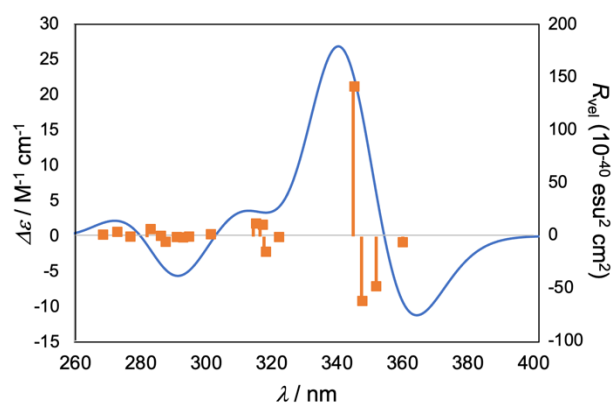

Figure S34. Calculated CD spectrum and rotatory strengths of *L*-LyMebNI from DFT calculation with SCRF = (pcm, solvent = CH<sub>3</sub>CN).

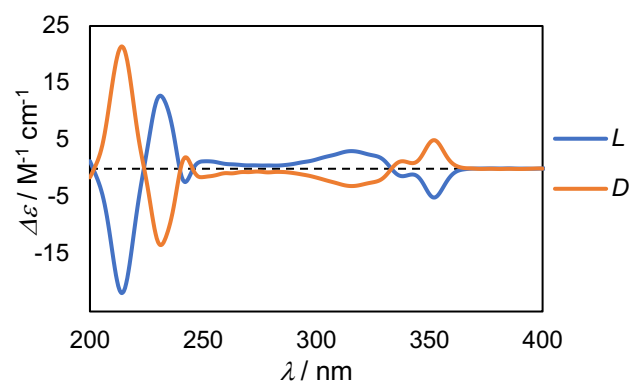

Figure S35. CD spectra of *D*-LyMebNI (orange line) and *L*-LyMebNI (blue line) in MeCN ( $2.5 \times 10^{-5}$  M) at room temperature.

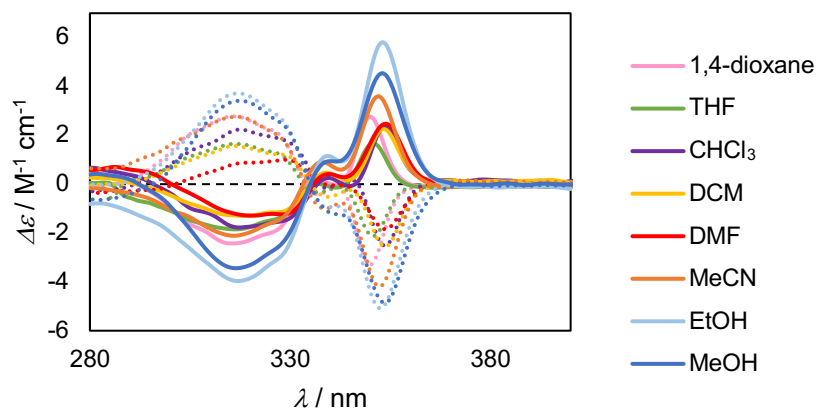

Figure S36. CD spectra of *D*-LybNI (solid line) and *L*-LybNI (dotted line) in 1,4-dioxane, THF,  $\text{CHCl}_3$ , DCM, DMF, MeCN, EtOH, and MeOH ( $2.5 \times 10^{-5}$  M) at room temperature.

Table S8. CD properties of *D*-LybNI (solid line) in 1,4-dioxane, THF, CHCl<sub>3</sub>, DCM, DMF, MeCN, EtOH, and MeOH ( $2.5 \times 10^{-5}$  M) at room temperature.

| solvent           | $\lambda_1 / \text{nm}$ | $\Delta\epsilon / \text{M}^{-1}\text{cm}^{-1}$ | $ g_{\text{abs}} $   | $\lambda_2 / \text{nm}$ | $\Delta\epsilon / \text{M}^{-1}\text{cm}^{-1}$ | $ g_{\text{abs}} $   |
|-------------------|-------------------------|------------------------------------------------|----------------------|-------------------------|------------------------------------------------|----------------------|
| 1,4-dioxane       | 350                     | 2.76                                           | $1.0 \times 10^{-4}$ | 315                     | -2.43                                          | $0.9 \times 10^{-4}$ |
| THF               | 351                     | 1.67                                           | $1.2 \times 10^{-4}$ | 316                     | -1.85                                          | $1.3 \times 10^{-4}$ |
| CHCl <sub>3</sub> | 354                     | 2.35                                           | $1.0 \times 10^{-4}$ | 317                     | -1.77                                          | $0.8 \times 10^{-4}$ |
| DCM               | 353                     | 2.25                                           | $1.5 \times 10^{-4}$ | 319                     | -1.31                                          | $0.9 \times 10^{-4}$ |
| DMF               | 354                     | 2.47                                           | $1.6 \times 10^{-4}$ | 321                     | -1.29                                          | $0.7 \times 10^{-4}$ |
| MeCN              | 352                     | 3.60                                           | $2.3 \times 10^{-4}$ | 316                     | -2.11                                          | $1.3 \times 10^{-4}$ |
| EtOH              | 353                     | 5.81                                           | $3.7 \times 10^{-4}$ | 317                     | -3.97                                          | $2.0 \times 10^{-4}$ |
| MeOH              | 353                     | 4.54                                           | $2.7 \times 10^{-4}$ | 316                     | -3.44                                          | $1.8 \times 10^{-4}$ |

Table S9. CD properties of *L*-LybNI (dotted line) in 1,4-dioxane, THF, CHCl<sub>3</sub>, DCM, DMF, MeCN, EtOH, and MeOH ( $2.5 \times 10^{-5}$  M) at room temperature.

| solvent           | $\lambda_1 / \text{nm}$ | $\Delta\epsilon / \text{M}^{-1}\text{cm}^{-1}$ | $ g_{\text{abs}} $   | $\lambda_2 / \text{nm}$ | $\Delta\epsilon / \text{M}^{-1}\text{cm}^{-1}$ | $ g_{\text{abs}} $   |
|-------------------|-------------------------|------------------------------------------------|----------------------|-------------------------|------------------------------------------------|----------------------|
| 1,4-dioxane       | 350                     | -3.30                                          | $1.2 \times 10^{-4}$ | 316                     | 2.78                                           | $1.0 \times 10^{-4}$ |
| THF               | 351                     | -2.12                                          | $1.6 \times 10^{-4}$ | 316                     | 1.65                                           | $1.1 \times 10^{-4}$ |
| CHCl <sub>3</sub> | 354                     | -2.51                                          | $1.1 \times 10^{-4}$ | 318                     | 2.23                                           | $1.2 \times 10^{-4}$ |
| DCM               | 354                     | -2.55                                          | $1.9 \times 10^{-4}$ | 317                     | 1.56                                           | $1.2 \times 10^{-4}$ |
| DMF               | 354                     | -1.84                                          | $1.2 \times 10^{-4}$ | 321                     | 1.00                                           | $0.5 \times 10^{-4}$ |
| MeCN              | 352                     | -4.19                                          | $2.3 \times 10^{-4}$ | 317                     | 2.76                                           | $1.6 \times 10^{-4}$ |
| EtOH              | 352                     | -5.06                                          | $2.9 \times 10^{-4}$ | 317                     | 3.72                                           | $1.9 \times 10^{-4}$ |
| MeOH              | 354                     | -4.85                                          | $3.2 \times 10^{-4}$ | 317                     | 3.41                                           | $1.7 \times 10^{-4}$ |

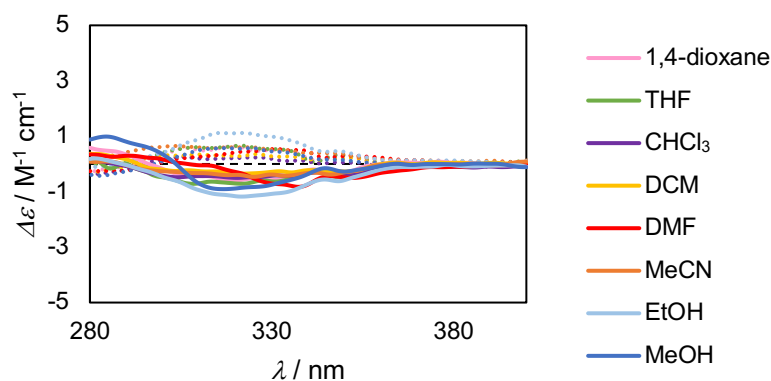

Figure S37. CD spectra of *D*-NorNI (solid line) and *L*-NorNI (dotted line) in 1,4-dioxane, THF, CHCl<sub>3</sub>, DCM, DMF, MeCN, EtOH, and MeOH ( $2.5 \times 10^{-5}$  M) at room temperature.

Table S10. CD properties of *D*-NorNI (solid line) and *L*-NorNI (dotted line) in 1,4-dioxane, THF, CHCl<sub>3</sub>, DCM, DMF, MeCN, EtOH, and MeOH ( $2.5 \times 10^{-5}$  M) at room temperature.

| solvent           | <i>D</i> -NorNI       |                                                   |                      | <i>L</i> -NorNI       |                                                   |                      |
|-------------------|-----------------------|---------------------------------------------------|----------------------|-----------------------|---------------------------------------------------|----------------------|
|                   | $\lambda / \text{nm}$ | $\Delta\varepsilon / \text{M}^{-1}\text{cm}^{-1}$ | $ g_{\text{abs}} $   | $\lambda / \text{nm}$ | $\Delta\varepsilon / \text{M}^{-1}\text{cm}^{-1}$ | $ g_{\text{abs}} $   |
| 1,4-dioxane       | 319                   | -0.62                                             | $0.5 \times 10^{-4}$ | 320                   | 0.64                                              | $0.5 \times 10^{-4}$ |
| THF               | 308                   | -0.72                                             | $1.0 \times 10^{-4}$ | 321                   | 0.66                                              | $0.6 \times 10^{-4}$ |
| CHCl <sub>3</sub> | 320                   | -0.50                                             | $0.5 \times 10^{-4}$ | 324                   | 0.23                                              | $0.2 \times 10^{-4}$ |
| DCM               | 323                   | -0.35                                             | $0.3 \times 10^{-4}$ | 326                   | 0.36                                              | $0.3 \times 10^{-4}$ |
| DMF               | 337                   | -0.82                                             | $0.6 \times 10^{-4}$ | 331                   | 0.54                                              | $0.4 \times 10^{-4}$ |
| MeCN              | 325                   | -0.47                                             | $0.4 \times 10^{-4}$ | 324                   | 0.60                                              | $0.5 \times 10^{-4}$ |
| EtOH              | 322                   | -1.18                                             | $0.9 \times 10^{-4}$ | 316                   | 1.12                                              | $0.9 \times 10^{-4}$ |
| MeOH              | 317                   | -0.91                                             | $1.0 \times 10^{-4}$ | 324                   | 0.58                                              | $0.5 \times 10^{-4}$ |

## 11. CPL spectra

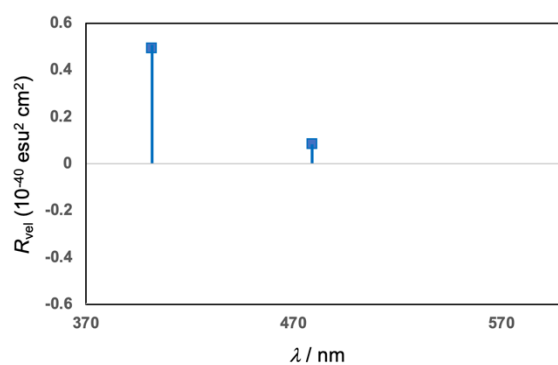

Figure S38. Calculated CPL rotatory strengths of *L*-LyMebNI from DFT calculations with SCRF = (pcm, solvent = CH<sub>3</sub>CN).

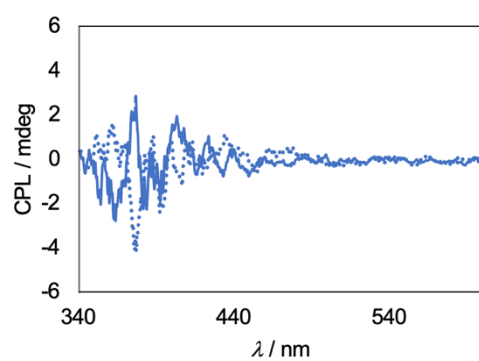

Figure S39. CPL spectra of *D* (solid line) and *L* (dotted line) forms of NorNI ( $2.5 \times 10^{-5}$  M) in MeCN at room temperature ( $\lambda_{\text{ex}} = 310$  nm). The  $|g_{\text{lum}}|$  value is  $9.0 \times 10^{-4}$  at 377 nm.

## 12. Cartesian coordinates and energies of the optimized geometries

L-LyMebNI (ground state (solvent=CH3CN) in Figure 6) LysMebNIRpcnh.out  
Standard orientation:

| Center<br>Number | Atomic<br>Number | Atomic<br>Type | Coordinates (Angstroms) |           |           |
|------------------|------------------|----------------|-------------------------|-----------|-----------|
|                  |                  |                | X                       | Y         | Z         |
| 1                | 8                | 0              | 2.894047                | -0.589817 | -1.790677 |
| 2                | 8                | 0              | 5.077154                | -1.366225 | 0.185272  |
| 3                | 8                | 0              | 2.319996                | -0.343280 | 2.731581  |
| 4                | 8                | 0              | -0.824417               | -0.710893 | -1.621207 |
| 5                | 8                | 0              | -3.954883               | -3.401021 | 0.342333  |
| 6                | 7                | 0              | 2.529405                | -0.475820 | 0.453912  |
| 7                | 8                | 0              | 4.371614                | -3.343794 | -0.645083 |
| 8                | 7                | 0              | -2.370869               | -2.050013 | -0.596041 |
| 9                | 6                | 0              | 2.288797                | 0.233785  | 1.645243  |
| 10               | 6                | 0              | -4.071805               | 0.191789  | -0.241016 |
| 11               | 6                | 0              | -4.497271               | -1.088428 | 0.197378  |
| 12               | 6                | 0              | -4.923708               | 1.323538  | -0.051543 |
| 13               | 6                | 0              | -1.919781               | -0.807022 | -1.068305 |
| 14               | 6                | 0              | 2.590310                | 0.105840  | -0.822216 |
| 15               | 6                | 0              | -2.810138               | 0.358845  | -0.867737 |
| 16               | 6                | 0              | 1.996417                | 1.677401  | 1.518331  |
| 17               | 6                | 0              | -3.621871               | -2.265168 | 0.001809  |
| 18               | 6                | 0              | 2.292315                | 1.547726  | -0.927681 |
| 19               | 6                | 0              | 2.002597                | 2.296809  | 0.241607  |
| 20               | 6                | 0              | -3.244993               | 2.737022  | -1.110432 |
| 21               | 6                | 0              | 1.720012                | 3.693319  | 0.132512  |
| 22               | 6                | 0              | 1.736616                | 4.294121  | -1.155051 |
| 23               | 6                | 0              | -2.407763               | 1.616147  | -1.294548 |
| 24               | 6                | 0              | -1.508361               | -3.238109 | -0.798152 |
| 25               | 6                | 0              | -4.477876               | 2.595462  | -0.501464 |
| 26               | 6                | 0              | 2.794117                | -1.927167 | 0.552548  |
| 27               | 6                | 0              | 2.303186                | 2.167709  | -2.168880 |
| 28               | 6                | 0              | 4.143304                | -2.293682 | -0.073741 |
| 29               | 6                | 0              | 1.717714                | 2.425843  | 2.653294  |
| 30               | 6                | 0              | 2.022485                | 3.545640  | -2.281791 |
| 31               | 6                | 0              | -0.746452               | -3.662182 | 0.468037  |
| 32               | 6                | 0              | 1.632879                | -2.793039 | 0.036261  |
| 33               | 6                | 0              | -5.734616               | -1.239345 | 0.806311  |
| 34               | 6                | 0              | 1.436552                | 3.804467  | 2.550531  |
| 35               | 6                | 0              | -6.579422               | -0.125159 | 0.996635  |
| 36               | 6                | 0              | -6.183585               | 1.131066  | 0.576832  |
| 37               | 6                | 0              | 1.437553                | 4.426882  | 1.316092  |
| 38               | 6                | 0              | 0.383841                | -2.724450 | 0.927848  |
| 39               | 6                | 0              | 6.410192                | -1.633762 | -0.304975 |
| 40               | 1                | 0              | 1.995231                | -3.826628 | 0.006825  |
| 41               | 1                | 0              | -0.330447               | -4.660744 | 0.272963  |
| 42               | 1                | 0              | 1.219803                | 4.374367  | 3.448912  |
| 43               | 1                | 0              | 0.009924                | -1.694229 | 0.986861  |
| 44               | 1                | 0              | 7.004769                | -0.772277 | -0.003309 |
| 45               | 1                | 0              | -7.544223               | -0.261376 | 1.475842  |
| 46               | 1                | 0              | -0.828833               | -2.995093 | -1.614056 |
| 47               | 1                | 0              | -1.470112               | -3.786078 | 1.281417  |
| 48               | 1                | 0              | 2.528194                | 1.579626  | -3.052650 |
| 49               | 1                | 0              | -6.834821               | 1.989045  | 0.723138  |
| 50               | 1                | 0              | 6.396931                | -1.730359 | -1.393075 |
| 51               | 1                | 0              | -5.122621               | 3.459140  | -0.360075 |
| 52               | 1                | 0              | -2.163144               | -4.050374 | -1.118401 |
| 53               | 1                | 0              | -6.045410               | -2.225406 | 1.135811  |
| 54               | 1                | 0              | -2.913548               | 3.713387  | -1.450959 |
| 55               | 1                | 0              | 2.915991                | -2.111490 | 1.624977  |
| 56               | 1                | 0              | 1.717574                | 1.937468  | 3.622211  |
| 57               | 1                | 0              | 1.521516                | 5.356080  | -1.241870 |
| 58               | 1                | 0              | 1.396925                | -2.506331 | -0.992376 |
| 59               | 1                | 0              | -1.439646               | 1.728149  | -1.771486 |
| 60               | 1                | 0              | 0.664349                | -3.007120 | 1.951404  |
| 61               | 1                | 0              | 1.222526                | 5.489515  | 1.237118  |
| 62               | 1                | 0              | 2.032902                | 4.015196  | -3.260730 |
| 63               | 1                | 0              | 6.800885                | -2.548771 | 0.146248  |



-----  
SCF Done: E(RB3LYP) = -1756.81467161 A.U. after 1 cycles  
Zero-point correction= 0.493248 (Hartree/Particle)  
Thermal correction to Energy= 0.524860  
Thermal correction to Enthalpy= 0.525805  
Thermal correction to Gibbs Free Energy= 0.427272  
Sum of electronic and zero-point Energies= -1756.321424  
Sum of electronic and thermal Energies= -1756.289811  
Sum of electronic and thermal Enthalpies= -1756.288867  
Sum of electronic and thermal Free Energies= -1756.387400

L-LyMebNI (excited state (solvent=CH3CN) in Figure 6) LysMebNI2R.tdoptpcmh.out  
 Standard orientation:

| Center<br>Number | Atomic<br>Number | Atomic<br>Type | Coordinates (Angstroms) |           |           |
|------------------|------------------|----------------|-------------------------|-----------|-----------|
|                  |                  |                | X                       | Y         | Z         |
| 1                | 6                | 0              | -3.800466               | -0.541873 | -2.182839 |
| 2                | 6                | 0              | -4.091161               | -1.100774 | -0.925637 |
| 3                | 6                | 0              | -3.626098               | -0.486885 | 0.263024  |
| 4                | 6                | 0              | -2.831018               | 0.698502  | 0.156688  |
| 5                | 6                | 0              | -2.518693               | 1.223951  | -1.120930 |
| 6                | 6                | 0              | -3.015878               | 0.602918  | -2.283606 |
| 7                | 6                | 0              | -3.903503               | -1.004554 | 1.550714  |
| 8                | 6                | 0              | -3.441133               | -0.346867 | 2.703560  |
| 9                | 6                | 0              | -2.683720               | 0.815998  | 2.597663  |
| 10               | 6                | 0              | -2.367450               | 1.340376  | 1.328807  |
| 11               | 6                | 0              | -1.552548               | 2.566651  | 1.226799  |
| 12               | 7                | 0              | -1.202157               | 3.005738  | -0.055095 |
| 13               | 6                | 0              | -1.662917               | 2.420512  | -1.243368 |
| 14               | 6                | 0              | -0.257764               | 4.145283  | -0.150433 |
| 15               | 6                | 0              | 1.182103                | 3.750150  | 0.222706  |
| 16               | 6                | 0              | 1.726602                | 2.552484  | -0.569625 |
| 17               | 6                | 0              | 3.005552                | 1.964353  | 0.043892  |
| 18               | 6                | 0              | 3.342631                | 0.564083  | -0.505326 |
| 19               | 6                | 0              | 4.643687                | 0.005412  | 0.070804  |
| 20               | 8                | 0              | 4.769084                | -1.310697 | -0.155616 |
| 21               | 8                | 0              | 5.508591                | 0.688523  | 0.589075  |
| 22               | 7                | 0              | 2.223978                | -0.390634 | -0.365557 |
| 23               | 6                | 0              | 1.567292                | -0.808229 | -1.538739 |
| 24               | 6                | 0              | 0.398077                | -1.675025 | -1.371853 |
| 25               | 6                | 0              | -0.025305               | -2.060128 | -0.072559 |
| 26               | 6                | 0              | 0.688100                | -1.638081 | 1.077913  |
| 27               | 6                | 0              | 1.879365                | -0.800072 | 0.930700  |
| 28               | 6                | 0              | -0.303206               | -2.127604 | -2.510977 |
| 29               | 6                | 0              | -1.421539               | -2.942144 | -2.363650 |
| 30               | 6                | 0              | -1.875615               | -3.311343 | -1.086362 |
| 31               | 6                | 0              | -1.183885               | -2.893432 | 0.078578  |
| 32               | 6                | 0              | -1.595957               | -3.252564 | 1.385679  |
| 33               | 6                | 0              | -0.868327               | -2.831401 | 2.510668  |
| 34               | 6                | 0              | 0.263170                | -2.034622 | 2.365015  |
| 35               | 8                | 0              | -1.350101               | 2.884523  | -2.344356 |
| 36               | 8                | 0              | -1.171671               | 3.185003  | 2.225620  |
| 37               | 8                | 0              | 1.970899                | -0.435441 | -2.651202 |
| 38               | 8                | 0              | 2.580088                | -0.442861 | 1.890495  |
| 39               | 1                | 0              | 0.046303                | -1.832504 | -3.494000 |
| 40               | 1                | 0              | -1.955002               | -3.291471 | -3.242715 |
| 41               | 1                | 0              | -2.739180               | -3.962433 | -0.983955 |
| 42               | 1                | 0              | -2.463482               | -3.894819 | 1.508564  |
| 43               | 1                | 0              | -1.194024               | -3.131657 | 3.502258  |
| 44               | 1                | 0              | 0.830987                | -1.708127 | 3.229317  |
| 45               | 1                | 0              | -2.325458               | 1.330441  | 3.482378  |
| 46               | 1                | 0              | -3.677820               | -0.751805 | 3.682263  |
| 47               | 1                | 0              | -4.512736               | -1.898480 | 1.644074  |
| 48               | 1                | 0              | -4.715591               | -1.986297 | -0.856932 |
| 49               | 1                | 0              | -4.185231               | -1.015172 | -3.080342 |
| 50               | 1                | 0              | -2.777002               | 1.031212  | -3.250457 |
| 51               | 6                | 0              | 5.994092                | -1.931113 | 0.294521  |
| 52               | 1                | 0              | -0.617945               | 4.930289  | 0.517837  |
| 53               | 1                | 0              | -0.315293               | 4.503075  | -1.177371 |
| 54               | 1                | 0              | 1.813266                | 4.635298  | 0.067617  |
| 55               | 1                | 0              | 1.217295                | 3.522963  | 1.294135  |
| 56               | 1                | 0              | 1.900429                | 2.834692  | -1.616471 |
| 57               | 1                | 0              | 0.957950                | 1.771997  | -0.583746 |
| 58               | 1                | 0              | 2.902683                | 1.902191  | 1.131440  |
| 59               | 1                | 0              | 3.863526                | 2.614130  | -0.158883 |
| 60               | 1                | 0              | 3.504284                | 0.636240  | -1.585748 |
| 61               | 1                | 0              | 6.095464                | -1.819876 | 1.376614  |
| 62               | 1                | 0              | 6.852401                | -1.479654 | -0.208553 |
| 63               | 1                | 0              | 5.899392                | -2.982162 | 0.024151  |

SCF Done: E(RB3LYP) = -1756.79965523 A.U. after 1 cycles  
 Zero-point correction= 0.490030 (Hartree/Particle)  
 Thermal correction to Energy= 0.521585  
 Thermal correction to Enthalpy= 0.522529

|                                              |              |
|----------------------------------------------|--------------|
| Thermal correction to Gibbs Free Energy=     | 0.428350     |
| Sum of electronic and zero-point Energies=   | -1756.214349 |
| Sum of electronic and thermal Energies=      | -1756.182795 |
| Sum of electronic and thermal Enthalpies=    | -1756.181851 |
| Sum of electronic and thermal Free Energies= | -1756.276030 |

L-LyMebNI (conformational isomer, ground state (solvent=CH3CN) in Table S7) LysMebNIA2pcmh.log  
 Standard orientation:

| Center Number | Atomic Number | Atomic Type | Coordinates (Angstroms) |           |           |
|---------------|---------------|-------------|-------------------------|-----------|-----------|
|               |               |             | X                       | Y         | Z         |
| 1             | 6             | 0           | 4.621604                | 3.265709  | 1.103949  |
| 2             | 6             | 0           | 5.752114                | 2.527021  | 1.399156  |
| 3             | 6             | 0           | 5.949992                | 1.242118  | 0.825846  |
| 4             | 6             | 0           | 4.956167                | 0.726763  | -0.062376 |
| 5             | 6             | 0           | 3.803183                | 1.500781  | -0.352047 |
| 6             | 6             | 0           | 3.644069                | 2.752335  | 0.225243  |
| 7             | 6             | 0           | 7.097537                | 0.449945  | 1.098795  |
| 8             | 6             | 0           | 7.252018                | -0.794432 | 0.516719  |
| 9             | 6             | 0           | 6.267935                | -1.298158 | -0.360372 |
| 10            | 6             | 0           | 5.133964                | -0.552721 | -0.648451 |
| 11            | 6             | 0           | 4.109333                | -1.091891 | -1.569709 |
| 12            | 7             | 0           | 2.969832                | -0.307684 | -1.802175 |
| 13            | 6             | 0           | 2.768046                | 0.977266  | -1.272015 |
| 14            | 6             | 0           | 1.949778                | -0.858074 | -2.724947 |
| 15            | 6             | 0           | 1.025430                | -1.898229 | -2.075750 |
| 16            | 6             | 0           | 0.121557                | -1.351846 | -0.960987 |
| 17            | 6             | 0           | -0.777600               | -2.459444 | -0.395908 |
| 18            | 6             | 0           | -1.735153               | -2.108608 | 0.757819  |
| 19            | 6             | 0           | -1.046079               | -1.832460 | 2.094528  |
| 20            | 8             | 0           | -1.931049               | -1.470251 | 3.036731  |
| 21            | 8             | 0           | 0.131292                | -2.046814 | 2.315686  |
| 22            | 7             | 0           | -2.738709               | -1.075261 | 0.413524  |
| 23            | 6             | 0           | -3.976456               | -1.535920 | -0.076218 |
| 24            | 6             | 0           | -4.980290               | -0.515016 | -0.440902 |
| 25            | 6             | 0           | -4.682622               | 0.863171  | -0.284369 |
| 26            | 6             | 0           | -3.425298               | 1.280964  | 0.222381  |
| 27            | 6             | 0           | -2.407429               | 0.277241  | 0.593804  |
| 28            | 6             | 0           | -6.215104               | -0.908720 | -0.937249 |
| 29            | 6             | 0           | -7.184216               | 0.053843  | -1.289612 |
| 30            | 6             | 0           | -6.913890               | 1.401931  | -1.144966 |
| 31            | 6             | 0           | -5.660537               | 1.842102  | -0.640992 |
| 32            | 6             | 0           | -5.341182               | 3.216853  | -0.476720 |
| 33            | 6             | 0           | -4.109317               | 3.602704  | 0.018255  |
| 34            | 6             | 0           | -3.147381               | 2.632565  | 0.369652  |
| 35            | 8             | 0           | 1.765398                | 1.626074  | -1.570323 |
| 36            | 8             | 0           | 4.227902                | -2.185597 | -2.123691 |
| 37            | 8             | 0           | -4.185770               | -2.743248 | -0.189867 |
| 38            | 8             | 0           | -1.306345               | 0.579627  | 1.050142  |
| 39            | 1             | 0           | -6.426932               | -1.966749 | -1.051282 |
| 40            | 1             | 0           | -8.145230               | -0.271644 | -1.676120 |
| 41            | 1             | 0           | -7.660831               | 2.143371  | -1.416570 |
| 42            | 1             | 0           | -6.082425               | 3.964486  | -0.747132 |
| 43            | 1             | 0           | -3.875193               | 4.656017  | 0.138835  |
| 44            | 1             | 0           | -2.180195               | 2.934967  | 0.757571  |
| 45            | 1             | 0           | 6.388800                | -2.275231 | -0.816689 |
| 46            | 1             | 0           | 8.132742                | -1.391976 | 0.732020  |
| 47            | 1             | 0           | 7.855778                | 0.838088  | 1.774189  |
| 48            | 1             | 0           | 6.505494                | 2.922610  | 2.075531  |
| 49            | 1             | 0           | 4.479423                | 4.246605  | 1.547455  |
| 50            | 1             | 0           | 2.756624                | 3.332316  | -0.005847 |
| 51            | 6             | 0           | -1.406849               | -1.241303 | 4.363052  |
| 52            | 1             | 0           | 2.487688                | -1.310867 | -3.559967 |
| 53            | 1             | 0           | 1.375092                | -0.008856 | -3.094045 |
| 54            | 1             | 0           | 0.402966                | -2.310574 | -2.882803 |
| 55            | 1             | 0           | 1.630411                | -2.730123 | -1.694802 |
| 56            | 1             | 0           | -0.490194               | -0.535444 | -1.363211 |
| 57            | 1             | 0           | 0.729991                | -0.924597 | -0.157723 |
| 58            | 1             | 0           | -0.153873               | -3.287943 | -0.037917 |
| 59            | 1             | 0           | -1.398495               | -2.868412 | -1.203305 |
| 60            | 1             | 0           | -2.334261               | -3.006434 | 0.940462  |
| 61            | 1             | 0           | -0.662123               | -0.442214 | 4.339084  |
| 62            | 1             | 0           | -0.958424               | -2.157223 | 4.755101  |
| 63            | 1             | 0           | -2.266062               | -0.946844 | 4.964634  |

SCF Done: E(RB3LYP) = -1756.81307325 A.U. after 5 cycles  
 Zero-point correction= 0.493325 (Hartree/Particle)  
 Thermal correction to Energy= 0.524918  
 Thermal correction to Enthalpy= 0.525862

|                                              |              |
|----------------------------------------------|--------------|
| Thermal correction to Gibbs Free Energy=     | 0.427307     |
| Sum of electronic and zero-point Energies=   | -1756.319748 |
| Sum of electronic and thermal Energies=      | -1756.288155 |
| Sum of electronic and thermal Enthalpies=    | -1756.287211 |
| Sum of electronic and thermal Free Energies= | -1756.385766 |

L-LyMebNI (conformational isomer, excited state (solvent=CH3CN) in Table S7)  
 LysMebNIA2Rtdoptpmh.log

Standard orientation:

| Center Number | Atomic Number | Atomic Type | Coordinates (Angstroms) |           |           |
|---------------|---------------|-------------|-------------------------|-----------|-----------|
|               |               |             | X                       | Y         | Z         |
| 1             | 6             | 0           | 4.611639                | 3.275059  | 1.069589  |
| 2             | 6             | 0           | 5.738130                | 2.535788  | 1.378445  |
| 3             | 6             | 0           | 5.934675                | 1.244185  | 0.819952  |
| 4             | 6             | 0           | 4.943511                | 0.722606  | -0.067679 |
| 5             | 6             | 0           | 3.794624                | 1.497366  | -0.371497 |
| 6             | 6             | 0           | 3.636785                | 2.755557  | 0.191470  |
| 7             | 6             | 0           | 7.078232                | 0.451186  | 1.107103  |
| 8             | 6             | 0           | 7.231578                | -0.799769 | 0.539038  |
| 9             | 6             | 0           | 6.250209                | -1.309573 | -0.337569 |
| 10            | 6             | 0           | 5.120059                | -0.563629 | -0.639029 |
| 11            | 6             | 0           | 4.098384                | -1.109424 | -1.559583 |
| 12            | 7             | 0           | 2.962580                | -0.324170 | -1.806013 |
| 13            | 6             | 0           | 2.762518                | 0.967335  | -1.291269 |
| 14            | 6             | 0           | 1.944886                | -0.881805 | -2.727039 |
| 15            | 6             | 0           | 1.016836                | -1.914169 | -2.070676 |
| 16            | 6             | 0           | 0.114098                | -1.359103 | -0.959279 |
| 17            | 6             | 0           | -0.781141               | -2.463235 | -0.381353 |
| 18            | 6             | 0           | -1.737069               | -2.100906 | 0.770229  |
| 19            | 6             | 0           | -1.045675               | -1.815936 | 2.103754  |
| 20            | 8             | 0           | -1.929936               | -1.449794 | 3.045668  |
| 21            | 8             | 0           | 0.131394                | -2.032018 | 2.326322  |
| 22            | 7             | 0           | -2.735486               | -1.066829 | 0.418448  |
| 23            | 6             | 0           | -3.970297               | -1.523316 | -0.070110 |
| 24            | 6             | 0           | -4.960539               | -0.512939 | -0.436506 |
| 25            | 6             | 0           | -4.665068               | 0.863774  | -0.285626 |
| 26            | 6             | 0           | -3.408888               | 1.275478  | 0.220755  |
| 27            | 6             | 0           | -2.403762               | 0.280555  | 0.591683  |
| 28            | 6             | 0           | -6.234589               | -0.928329 | -0.948990 |
| 29            | 6             | 0           | -7.172884               | 0.023926  | -1.294806 |
| 30            | 6             | 0           | -6.891871               | 1.407193  | -1.149144 |
| 31            | 6             | 0           | -5.644782               | 1.847640  | -0.646735 |
| 32            | 6             | 0           | -5.320335               | 3.215264  | -0.483783 |
| 33            | 6             | 0           | -4.056650               | 3.611484  | 0.025946  |
| 34            | 6             | 0           | -3.109772               | 2.669569  | 0.376318  |
| 35            | 8             | 0           | 1.763593                | 1.616216  | -1.601757 |
| 36            | 8             | 0           | 4.216267                | -2.209318 | -2.101379 |
| 37            | 8             | 0           | -4.198908               | -2.742188 | -0.184695 |
| 38            | 8             | 0           | -1.294242               | 0.601312  | 1.053724  |
| 39            | 1             | 0           | -6.433349               | -1.988113 | -1.054862 |
| 40            | 1             | 0           | -8.139625               | -0.280359 | -1.684305 |
| 41            | 1             | 0           | -7.642868               | 2.141435  | -1.426947 |
| 42            | 1             | 0           | -6.052440               | 3.971336  | -0.753867 |
| 43            | 1             | 0           | -3.840414               | 4.669502  | 0.138155  |
| 44            | 1             | 0           | -2.139997               | 2.954247  | 0.766657  |
| 45            | 1             | 0           | 6.370152                | -2.291596 | -0.783339 |
| 46            | 1             | 0           | 8.109273                | -1.397781 | 0.765109  |
| 47            | 1             | 0           | 7.834241                | 0.844108  | 1.782222  |
| 48            | 1             | 0           | 6.489351                | 2.935939  | 2.054542  |
| 49            | 1             | 0           | 4.470579                | 4.261028  | 1.502035  |
| 50            | 1             | 0           | 2.752472                | 3.335784  | -0.050637 |
| 51            | 6             | 0           | -1.404331               | -1.217226 | 4.370421  |
| 52            | 1             | 0           | 2.485067                | -1.344134 | -3.555398 |
| 53            | 1             | 0           | 1.373782                | -0.034951 | -3.106918 |
| 54            | 1             | 0           | 0.393519                | -2.330853 | -2.874928 |
| 55            | 1             | 0           | 1.619574                | -2.744966 | -1.683720 |
| 56            | 1             | 0           | -0.501843               | -0.548437 | -1.366880 |
| 57            | 1             | 0           | 0.723070                | -0.922204 | -0.161774 |
| 58            | 1             | 0           | -0.155334               | -3.286987 | -0.016144 |
| 59            | 1             | 0           | -1.403211               | -2.880982 | -1.183352 |
| 60            | 1             | 0           | -2.340270               | -2.995016 | 0.959118  |
| 61            | 1             | 0           | -0.660179               | -0.417615 | 4.343884  |
| 62            | 1             | 0           | -0.954699               | -2.131788 | 4.764436  |
| 63            | 1             | 0           | -2.262889               | -0.921925 | 4.972611  |

-----  
 Zero-point correction= 0.489448 (Hartree/Particle)  
 Thermal correction to Energy= 0.521568  
 Thermal correction to Enthalpy= 0.522512

|                                              |              |
|----------------------------------------------|--------------|
| Thermal correction to Gibbs Free Energy=     | 0.422587     |
| Sum of electronic and zero-point Energies=   | -1756.203306 |
| Sum of electronic and thermal Energies=      | -1756.171186 |
| Sum of electronic and thermal Enthalpies=    | -1756.170242 |
| Sum of electronic and thermal Free Energies= | -1756.270167 |

L-LyMebNI (ground state (solvent= Chloroform) in Table S7) LysMebNIXCpcmh.out  
 Standard orientation:

| Center<br>Number | Atomic<br>Number | Atomic<br>Type | Coordinates (Angstroms) |           |           |
|------------------|------------------|----------------|-------------------------|-----------|-----------|
|                  |                  |                | X                       | Y         | Z         |
| 1                | 8                | 0              | -2.903780               | -0.616307 | 1.784777  |
| 2                | 8                | 0              | -5.063056               | -1.364860 | -0.210403 |
| 3                | 8                | 0              | -2.271839               | -0.331717 | -2.729127 |
| 4                | 8                | 0              | 0.795020                | -0.654491 | 1.552015  |
| 5                | 8                | 0              | 3.969593                | -3.404208 | -0.255201 |
| 6                | 7                | 0              | -2.515865               | -0.485179 | -0.455852 |
| 7                | 8                | 0              | -4.383465               | -3.379159 | 0.551333  |
| 8                | 7                | 0              | 2.367170                | -2.028110 | 0.614256  |
| 9                | 6                | 0              | -2.264269               | 0.234223  | -1.637762 |
| 10               | 6                | 0              | 4.075180                | 0.204127  | 0.222200  |
| 11               | 6                | 0              | 4.507055                | -1.088112 | -0.172128 |
| 12               | 6                | 0              | 4.931592                | 1.329769  | 0.017050  |
| 13               | 6                | 0              | 1.903733                | -0.770668 | 1.033930  |
| 14               | 6                | 0              | -2.592547               | 0.084887  | 0.825797  |
| 15               | 6                | 0              | 2.802332                | 0.388763  | 0.820584  |
| 16               | 6                | 0              | -1.989283               | 1.682137  | -1.496170 |
| 17               | 6                | 0              | 3.628742                | -2.261049 | 0.044328  |
| 18               | 6                | 0              | -2.302946               | 1.529609  | 0.945305  |
| 19               | 6                | 0              | -2.012326               | 2.291723  | -0.214978 |
| 20               | 6                | 0              | 3.236184                | 2.771051  | 1.009285  |
| 21               | 6                | 0              | -1.745310               | 3.690364  | -0.092568 |
| 22               | 6                | 0              | -1.776578               | 4.279154  | 1.200326  |
| 23               | 6                | 0              | 2.393757                | 1.656156  | 1.207531  |
| 24               | 6                | 0              | 1.504000                | -3.211095 | 0.842902  |
| 25               | 6                | 0              | 4.478955                | 2.613069  | 0.425542  |
| 26               | 6                | 0              | -2.777833               | -1.935557 | -0.569810 |
| 27               | 6                | 0              | -2.326980               | 2.136945  | 2.191393  |
| 28               | 6                | 0              | -4.138772               | -2.311012 | 0.025305  |
| 29               | 6                | 0              | -1.710654               | 2.441329  | -2.622928 |
| 30               | 6                | 0              | -2.060554               | 3.517114  | 2.318090  |
| 31               | 6                | 0              | 0.757333                | -3.675550 | -0.418141 |
| 32               | 6                | 0              | -1.627048               | -2.803021 | -0.033165 |
| 33               | 6                | 0              | 5.753809                | -1.257205 | -0.755037 |
| 34               | 6                | 0              | -1.446687               | 3.822821  | -2.507475 |
| 35               | 6                | 0              | 6.602766                | -0.148750 | -0.962066 |
| 36               | 6                | 0              | 6.201684                | 1.118709  | -0.584053 |
| 37               | 6                | 0              | -1.463506               | 4.435823  | -1.268802 |
| 38               | 6                | 0              | -0.370619               | -2.754293 | -0.915236 |
| 39               | 6                | 0              | -6.398752               | -1.641482 | 0.262430  |
| 40               | 1                | 0              | -1.997562               | -3.833180 | 0.009560  |
| 41               | 1                | 0              | 0.341457                | -4.668921 | -0.197279 |
| 42               | 1                | 0              | -1.230917               | 4.402267  | -3.400207 |
| 43               | 1                | 0              | 0.000874                | -1.724810 | -0.997741 |
| 44               | 1                | 0              | -6.987941               | -0.767592 | -0.014281 |
| 45               | 1                | 0              | 7.575631                | -0.298875 | -1.420694 |
| 46               | 1                | 0              | 0.814689                | -2.943462 | 1.643025  |
| 47               | 1                | 0              | 1.490894                | -3.823393 | -1.218628 |
| 48               | 1                | 0              | -2.550497               | 1.535958  | 3.066819  |
| 49               | 1                | 0              | 6.856765                | 1.971872  | -0.742512 |
| 50               | 1                | 0              | -6.392132               | -1.774840 | 1.346842  |
| 51               | 1                | 0              | 5.127128                | 3.472504  | 0.272841  |
| 52               | 1                | 0              | 2.157772                | -4.011458 | 1.193946  |
| 53               | 1                | 0              | 6.067298                | -2.253396 | -1.049850 |
| 54               | 1                | 0              | 2.900570                | 3.756341  | 1.319235  |
| 55               | 1                | 0              | -2.876547               | -2.111707 | -1.646208 |
| 56               | 1                | 0              | -1.698408               | 1.957866  | -3.594270 |
| 57               | 1                | 0              | -1.574618               | 5.343067  | 1.297885  |
| 58               | 1                | 0              | -1.399308               | -2.502258 | 0.993123  |
| 59               | 1                | 0              | 1.417356                | 1.778084  | 1.664919  |
| 60               | 1                | 0              | -0.640490               | -3.063067 | -1.934258 |
| 61               | 1                | 0              | -1.262057               | 5.500624  | -1.180556 |
| 62               | 1                | 0              | -2.081839               | 3.977590  | 3.301388  |
| 63               | 1                | 0              | -6.791797               | -2.540136 | -0.219159 |

SCF Done: E(RB3LYP) = -1756.80714974 A.U. after 1 cycles  
 Zero-point correction= 0.493472 (Hartree/Particle)  
 Thermal correction to Energy= 0.525073  
 Thermal correction to Enthalpy= 0.526017



|                                              |              |
|----------------------------------------------|--------------|
| Thermal correction to Gibbs Free Energy=     | 0.427496     |
| Sum of electronic and zero-point Energies=   | -1756.313678 |
| Sum of electronic and thermal Energies=      | -1756.282077 |
| Sum of electronic and thermal Enthalpies=    | -1756.281132 |
| Sum of electronic and thermal Free Energies= | -1756.379653 |

L-LyMebNI (excited state (solvent=Chloroform) in Table S7) LysMebNICR.log  
 Standard orientation:

| Center<br>Number | Atomic<br>Number | Atomic<br>Type | Coordinates (Angstroms) |           |           |
|------------------|------------------|----------------|-------------------------|-----------|-----------|
|                  |                  |                | X                       | Y         | Z         |
| 1                | 6                | 0              | -3.792396               | -0.546402 | -2.173470 |
| 2                | 6                | 0              | -4.077121               | -1.105970 | -0.915406 |
| 3                | 6                | 0              | -3.612751               | -0.489650 | 0.272114  |
| 4                | 6                | 0              | -2.825278               | 0.700387  | 0.162547  |
| 5                | 6                | 0              | -2.521106               | 1.228307  | -1.115554 |
| 6                | 6                | 0              | -3.016094               | 0.603810  | -2.276938 |
| 7                | 6                | 0              | -3.884888               | -1.005013 | 1.561795  |
| 8                | 6                | 0              | -3.421607               | -0.344122 | 2.712284  |
| 9                | 6                | 0              | -2.669611               | 0.821877  | 2.602755  |
| 10               | 6                | 0              | -2.361486               | 1.346034  | 1.332176  |
| 11               | 6                | 0              | -1.554142               | 2.579910  | 1.228005  |
| 12               | 7                | 0              | -1.210659               | 3.019872  | -0.055422 |
| 13               | 6                | 0              | -1.676733               | 2.435408  | -1.242542 |
| 14               | 6                | 0              | -0.265526               | 4.158939  | -0.154841 |
| 15               | 6                | 0              | 1.173550                | 3.761012  | 0.219016  |
| 16               | 6                | 0              | 1.713689                | 2.558731  | -0.569283 |
| 17               | 6                | 0              | 2.994328                | 1.971851  | 0.041551  |
| 18               | 6                | 0              | 3.331289                | 0.572427  | -0.510962 |
| 19               | 6                | 0              | 4.637020                | 0.019574  | 0.060141  |
| 20               | 8                | 0              | 4.749623                | -1.305328 | -0.128831 |
| 21               | 8                | 0              | 5.514482                | 0.710905  | 0.541835  |
| 22               | 7                | 0              | 2.214844                | -0.383992 | -0.369047 |
| 23               | 6                | 0              | 1.565115                | -0.810290 | -1.543789 |
| 24               | 6                | 0              | 0.400102                | -1.685121 | -1.376155 |
| 25               | 6                | 0              | -0.020377               | -2.075020 | -0.077568 |
| 26               | 6                | 0              | 0.688084                | -1.645420 | 1.073176  |
| 27               | 6                | 0              | 1.871626                | -0.793408 | 0.928163  |
| 28               | 6                | 0              | -0.294379               | -2.144265 | -2.516451 |
| 29               | 6                | 0              | -1.403915               | -2.971041 | -2.370457 |
| 30               | 6                | 0              | -1.854703               | -3.346654 | -1.094038 |
| 31               | 6                | 0              | -1.169482               | -2.922446 | 0.072546  |
| 32               | 6                | 0              | -1.573659               | -3.290111 | 1.379792  |
| 33               | 6                | 0              | -0.849877               | -2.862302 | 2.504643  |
| 34               | 6                | 0              | 0.270366                | -2.049408 | 2.359877  |
| 35               | 8                | 0              | -1.382270               | 2.903889  | -2.343661 |
| 36               | 8                | 0              | -1.178384               | 3.198522  | 2.225636  |
| 37               | 8                | 0              | 1.966892                | -0.440355 | -2.655431 |
| 38               | 8                | 0              | 2.561285                | -0.426389 | 1.889509  |
| 39               | 1                | 0              | 0.056621                | -1.844190 | -3.497431 |
| 40               | 1                | 0              | -1.930393               | -3.328258 | -3.250983 |
| 41               | 1                | 0              | -2.709576               | -4.010144 | -0.993157 |
| 42               | 1                | 0              | -2.430401               | -3.947594 | 1.502139  |
| 43               | 1                | 0              | -1.167549               | -3.172315 | 3.496165  |
| 44               | 1                | 0              | 0.837843                | -1.716757 | 3.222061  |
| 45               | 1                | 0              | -2.308439               | 1.340828  | 3.483701  |
| 46               | 1                | 0              | -3.653466               | -0.748345 | 3.692561  |
| 47               | 1                | 0              | -4.490742               | -1.901041 | 1.659103  |
| 48               | 1                | 0              | -4.694839               | -1.996319 | -0.844616 |
| 49               | 1                | 0              | -4.175303               | -1.022787 | -3.070280 |
| 50               | 1                | 0              | -2.779497               | 1.034987  | -3.243093 |
| 51               | 6                | 0              | 5.974212                | -1.916006 | 0.329567  |
| 52               | 1                | 0              | -0.624432               | 4.945622  | 0.512329  |
| 53               | 1                | 0              | -0.324417               | 4.512122  | -1.183483 |
| 54               | 1                | 0              | 1.806940                | 4.643864  | 0.058902  |
| 55               | 1                | 0              | 1.209677                | 3.540006  | 1.291661  |
| 56               | 1                | 0              | 1.880007                | 2.833154  | -1.619367 |
| 57               | 1                | 0              | 0.944609                | 1.778180  | -0.576159 |
| 58               | 1                | 0              | 2.895312                | 1.906984  | 1.129277  |
| 59               | 1                | 0              | 3.852339                | 2.621633  | -0.160952 |
| 60               | 1                | 0              | 3.487803                | 0.645226  | -1.592332 |
| 61               | 1                | 0              | 6.087622                | -1.767515 | 1.406100  |
| 62               | 1                | 0              | 6.830930                | -1.486685 | -0.195723 |
| 63               | 1                | 0              | 5.871540                | -2.975482 | 0.096220  |

SCF Done: E(RB3LYP) = -1756.79161212 A.U. after 1 cycles  
 Zero-point correction= 0.490070 (Hartree/Particle)  
 Thermal correction to Energy= 0.521680  
 Thermal correction to Enthalpy= 0.522624

|                                              |              |
|----------------------------------------------|--------------|
| Thermal correction to Gibbs Free Energy=     | 0.428176     |
| Sum of electronic and zero-point Energies=   | -1756.204423 |
| Sum of electronic and thermal Energies=      | -1756.172813 |
| Sum of electronic and thermal Enthalpies=    | -1756.171869 |
| Sum of electronic and thermal Free Energies= | -1756.266317 |

L-LyMebNI (conformational isomer, ground state (solvent=Chloroform) in Table S7)  
 LysMebNIC2pcmh.log

Standard orientation:

| Center<br>Number | Atomic<br>Number | Atomic<br>Type | Coordinates (Angstroms) |           |           |
|------------------|------------------|----------------|-------------------------|-----------|-----------|
|                  |                  |                | X                       | Y         | Z         |
| 1                | 6                | 0              | -4.525879               | 3.300815  | -1.090266 |
| 2                | 6                | 0              | -5.642486               | 2.561140  | -1.431023 |
| 3                | 6                | 0              | -5.856368               | 1.271181  | -0.875329 |
| 4                | 6                | 0              | -4.892180               | 0.752253  | 0.043034  |
| 5                | 6                | 0              | -3.753619               | 1.528361  | 0.380082  |
| 6                | 6                | 0              | -3.578123               | 2.784194  | -0.180947 |
| 7                | 6                | 0              | -6.990186               | 0.476391  | -1.193923 |
| 8                | 6                | 0              | -7.159104               | -0.773115 | -0.627829 |
| 9                | 6                | 0              | -6.203510               | -1.280864 | 0.278394  |
| 10               | 6                | 0              | -5.084334               | -0.533101 | 0.611334  |
| 11               | 6                | 0              | -4.087996               | -1.078919 | 1.561725  |
| 12               | 7                | 0              | -2.958779               | -0.293265 | 1.836370  |
| 13               | 6                | 0              | -2.748401               | 1.002296  | 1.333647  |
| 14               | 6                | 0              | -1.960805               | -0.853324 | 2.776260  |
| 15               | 6                | 0              | -1.032594               | -1.897810 | 2.139530  |
| 16               | 6                | 0              | -0.131063               | -1.365292 | 1.015984  |
| 17               | 6                | 0              | 0.777505                | -2.479264 | 0.478164  |
| 18               | 6                | 0              | 1.723046                | -2.152889 | -0.692461 |
| 19               | 6                | 0              | 1.018237                | -1.926027 | -2.030433 |
| 20               | 8                | 0              | 1.890997                | -1.573144 | -2.990530 |
| 21               | 8                | 0              | -0.154757               | -2.168693 | -2.236409 |
| 22               | 7                | 0              | 2.715624                | -1.097282 | -0.386329 |
| 23               | 6                | 0              | 3.963314                | -1.528051 | 0.104168  |
| 24               | 6                | 0              | 4.957623                | -0.482456 | 0.430430  |
| 25               | 6                | 0              | 4.639451                | 0.887071  | 0.241813  |
| 26               | 6                | 0              | 3.372059                | 1.273580  | -0.264330 |
| 27               | 6                | 0              | 2.364974                | 0.245649  | -0.605231 |
| 28               | 6                | 0              | 6.201444                | -0.846871 | 0.924688  |
| 29               | 6                | 0              | 7.160153                | 0.137933  | 1.243798  |
| 30               | 6                | 0              | 6.869673                | 1.477956  | 1.068931  |
| 31               | 6                | 0              | 5.606029                | 1.888505  | 0.565868  |
| 32               | 6                | 0              | 5.263838                | 3.253801  | 0.371631  |
| 33               | 6                | 0              | 4.021876                | 3.608654  | -0.120351 |
| 34               | 6                | 0              | 3.071455                | 2.616021  | -0.440552 |
| 35               | 8                | 0              | -1.767992               | 1.657428  | 1.680555  |
| 36               | 8                | 0              | -4.222867               | -2.175965 | 2.101823  |
| 37               | 8                | 0              | 4.191830                | -2.726965 | 0.251833  |
| 38               | 8                | 0              | 1.261167                | 0.521970  | -1.065734 |
| 39               | 1                | 0              | 6.426637                | -1.899288 | 1.062879  |
| 40               | 1                | 0              | 8.129194                | -0.164447 | 1.629488  |
| 41               | 1                | 0              | 7.608645                | 2.236060  | 1.316026  |
| 42               | 1                | 0              | 5.995692                | 4.019234  | 0.617695  |
| 43               | 1                | 0              | 3.770077                | 4.655381  | -0.262225 |
| 44               | 1                | 0              | 2.094877                | 2.891702  | -0.824948 |
| 45               | 1                | 0              | -6.332812               | -2.262721 | 0.722071  |
| 46               | 1                | 0              | -8.029125               | -1.372700 | -0.878865 |
| 47               | 1                | 0              | -7.726479               | 0.866733  | -1.892312 |
| 48               | 1                | 0              | -6.372484               | 2.959439  | -2.131418 |
| 49               | 1                | 0              | -4.370996               | 4.285211  | -1.522038 |
| 50               | 1                | 0              | -2.699671               | 3.362243  | 0.086538  |
| 51               | 6                | 0              | 1.345098                | -1.378411 | -4.311853 |
| 52               | 1                | 0              | -2.516083               | -1.306743 | 3.599980  |
| 53               | 1                | 0              | -1.387617               | -0.007967 | 3.156646  |
| 54               | 1                | 0              | -0.409091               | -2.297920 | 2.952407  |
| 55               | 1                | 0              | -1.635431               | -2.736298 | 1.770345  |
| 56               | 1                | 0              | 0.472328                | -0.533412 | 1.399276  |
| 57               | 1                | 0              | -0.740389               | -0.962230 | 0.201203  |
| 58               | 1                | 0              | 0.159282                | -3.323181 | 0.147986  |
| 59               | 1                | 0              | 1.408201                | -2.859131 | 1.292435  |
| 60               | 1                | 0              | 2.332909                | -3.048098 | -0.851695 |
| 61               | 1                | 0              | 0.590689                | -0.588252 | -4.292395 |
| 62               | 1                | 0              | 0.900174                | -2.306667 | -4.678648 |
| 63               | 1                | 0              | 2.191797                | -1.086608 | -4.932750 |

SCF Done: E(RB3LYP) = -1756.80549944 A.U. after 5 cycles  
 Zero-point correction= 0.493409 (Hartree/Particle)  
 Thermal correction to Energy= 0.525038

|                                              |              |
|----------------------------------------------|--------------|
| Thermal correction to Enthalpy=              | 0.525983     |
| Thermal correction to Gibbs Free Energy=     | 0.426730     |
| Sum of electronic and zero-point Energies=   | -1756.312091 |
| Sum of electronic and thermal Energies=      | -1756.280461 |
| Sum of electronic and thermal Enthalpies=    | -1756.279517 |
| Sum of electronic and thermal Free Energies= | -1756.378769 |

L-LyMebNI (conformational isomer, excited state (solvent=Chloroform) in Table S7)  
 LysMebNIC2Rtdoptpmh.log

Standard orientation:

| Center<br>Number | Atomic<br>Number | Atomic<br>Type | Coordinates (Angstroms) |           |           |
|------------------|------------------|----------------|-------------------------|-----------|-----------|
|                  |                  |                | X                       | Y         | Z         |
| 1                | 6                | 0              | 3.203474                | 3.616957  | 0.602827  |
| 2                | 6                | 0              | 4.268816                | 3.056986  | 1.329835  |
| 3                | 6                | 0              | 4.738017                | 1.755610  | 1.036914  |
| 4                | 6                | 0              | 4.105805                | 1.022067  | -0.009293 |
| 5                | 6                | 0              | 3.038270                | 1.596866  | -0.728655 |
| 6                | 6                | 0              | 2.592629                | 2.897597  | -0.419122 |
| 7                | 6                | 0              | 5.802223                | 1.150700  | 1.740739  |
| 8                | 6                | 0              | 6.229640                | -0.148953 | 1.413945  |
| 9                | 6                | 0              | 5.608208                | -0.860394 | 0.392260  |
| 10               | 6                | 0              | 4.542041                | -0.281015 | -0.322447 |
| 11               | 6                | 0              | 3.870214                | -1.065058 | -1.402282 |
| 12               | 7                | 0              | 2.788651                | -0.475804 | -2.050653 |
| 13               | 6                | 0              | 2.361274                | 0.833819  | -1.819819 |
| 14               | 6                | 0              | 2.035318                | -1.305302 | -3.030208 |
| 15               | 6                | 0              | 1.128052                | -2.341691 | -2.347637 |
| 16               | 6                | 0              | 0.203939                | -1.755617 | -1.271286 |
| 17               | 6                | 0              | -0.727963               | -2.819894 | -0.679175 |
| 18               | 6                | 0              | -1.558963               | -2.411205 | 0.551704  |
| 19               | 6                | 0              | -0.746088               | -2.333591 | 1.842164  |
| 20               | 8                | 0              | -1.524664               | -1.997103 | 2.888223  |
| 21               | 8                | 0              | 0.413752                | -2.691438 | 1.959643  |
| 22               | 7                | 0              | -2.400788               | -1.220996 | 0.342455  |
| 23               | 6                | 0              | -3.703396               | -1.457175 | -0.144970 |
| 24               | 6                | 0              | -4.536148               | -0.291639 | -0.366208 |
| 25               | 6                | 0              | -4.032967               | 1.008238  | -0.079077 |
| 26               | 6                | 0              | -2.711642               | 1.189841  | 0.423740  |
| 27               | 6                | 0              | -1.860517               | 0.044299  | 0.640844  |
| 28               | 6                | 0              | -5.850500               | -0.450787 | -0.865853 |
| 29               | 6                | 0              | -6.656912               | 0.665797  | -1.075848 |
| 30               | 6                | 0              | -6.185878               | 1.952633  | -0.799234 |
| 31               | 6                | 0              | -4.874498               | 2.158942  | -0.297822 |
| 32               | 6                | 0              | -4.353987               | 3.447592  | 0.000730  |
| 33               | 6                | 0              | -3.056570               | 3.599543  | 0.497618  |
| 34               | 6                | 0              | -2.235681               | 2.493924  | 0.710444  |
| 35               | 8                | 0              | 1.467644                | 1.353362  | -2.471669 |
| 36               | 8                | 0              | 4.260493                | -2.187943 | -1.692741 |
| 37               | 8                | 0              | -4.075824               | -2.632021 | -0.366252 |
| 38               | 8                | 0              | -0.686731               | 0.111756  | 1.081594  |
| 39               | 1                | 0              | -6.210235               | -1.451645 | -1.077322 |
| 40               | 1                | 0              | -7.666340               | 0.535241  | -1.459569 |
| 41               | 1                | 0              | -6.825181               | 2.816798  | -0.965313 |
| 42               | 1                | 0              | -4.985053               | 4.318351  | -0.161180 |
| 43               | 1                | 0              | -2.683770               | 4.596723  | 0.722440  |
| 44               | 1                | 0              | -1.229744               | 2.608294  | 1.098610  |
| 45               | 1                | 0              | 5.924320                | -1.864946 | 0.136032  |
| 46               | 1                | 0              | 7.046386                | -0.598625 | 1.967164  |
| 47               | 1                | 0              | 6.291552                | 1.694953  | 2.542520  |
| 48               | 1                | 0              | 4.736576                | 3.625894  | 2.127125  |
| 49               | 1                | 0              | 2.855097                | 4.614299  | 0.845831  |
| 50               | 1                | 0              | 1.766445                | 3.313876  | -0.983281 |
| 51               | 6                | 0              | -0.875445               | -1.911596 | 4.168281  |
| 52               | 1                | 0              | 2.769623                | -1.793461 | -3.673972 |
| 53               | 1                | 0              | 1.452028                | -0.605843 | -3.627311 |
| 54               | 1                | 0              | 0.535981                | -2.807943 | -3.147317 |
| 55               | 1                | 0              | 1.745365                | -3.136692 | -1.912351 |
| 56               | 1                | 0              | -0.391560               | -0.938705 | -1.697951 |
| 57               | 1                | 0              | 0.800473                | -1.318481 | -0.465922 |
| 58               | 1                | 0              | -0.141800               | -3.700918 | -0.388959 |
| 59               | 1                | 0              | -1.437321               | -3.152339 | -1.447000 |
| 60               | 1                | 0              | -2.277541               | -3.221038 | 0.718106  |
| 61               | 1                | 0              | -0.088429               | -1.153090 | 4.139625  |
| 62               | 1                | 0              | -0.446704               | -2.877984 | 4.447168  |
| 63               | 1                | 0              | -1.657152               | -1.623009 | 4.871187  |

SCF Done: E(RB3LYP) = -1756.79624240 A.U. after 1 cycles  
 Zero-point correction= 0.489935 (Hartree/Particle)  
 Thermal correction to Energy= 0.521959

|                                              |              |
|----------------------------------------------|--------------|
| Thermal correction to Enthalpy=              | 0.522903     |
| Thermal correction to Gibbs Free Energy=     | 0.423032     |
| Sum of electronic and zero-point Energies=   | -1756.195646 |
| Sum of electronic and thermal Energies=      | -1756.163622 |
| Sum of electronic and thermal Enthalpies=    | -1756.162678 |
| Sum of electronic and thermal Free Energies= | -1756.262550 |

L-LyMebNI (ground state (solvent=methanol) in Table S7) LysMebNIRXMeOHpcmh.out  
 Standard orientation:

| Center<br>Number | Atomic<br>Number | Atomic<br>Type | Coordinates (Angstroms) |           |           |
|------------------|------------------|----------------|-------------------------|-----------|-----------|
|                  |                  |                | X                       | Y         | Z         |
| 1                | 8                | 0              | -2.895287               | -0.590294 | 1.790348  |
| 2                | 8                | 0              | -5.077106               | -1.366172 | -0.187206 |
| 3                | 8                | 0              | -2.317638               | -0.342990 | -2.731455 |
| 4                | 8                | 0              | 0.823821                | -0.709030 | 1.620098  |
| 5                | 8                | 0              | 3.954897                | -3.401461 | -0.339366 |
| 6                | 7                | 0              | -2.529121               | -0.475901 | -0.453998 |
| 7                | 8                | 0              | -4.372431               | -3.344385 | 0.642310  |
| 8                | 7                | 0              | 2.370622                | -2.049391 | 0.597074  |
| 9                | 6                | 0              | -2.287657               | 0.233901  | -1.645011 |
| 10               | 6                | 0              | 4.071934                | 0.191910  | 0.240459  |
| 11               | 6                | 0              | 4.497406                | -1.088779 | -0.196558 |
| 12               | 6                | 0              | 4.924024                | 1.323384  | 0.050191  |
| 13               | 6                | 0              | 1.919409                | -0.805870 | 1.067833  |
| 14               | 6                | 0              | -2.590952               | 0.105501  | 0.822228  |
| 15               | 6                | 0              | 2.810067                | 0.359693  | 0.866574  |
| 16               | 6                | 0              | -1.995584               | 1.677575  | -1.517618 |
| 17               | 6                | 0              | 3.621867                | -2.265287 | -0.000026 |
| 18               | 6                | 0              | -2.293043               | 1.547401  | 0.928168  |
| 19               | 6                | 0              | -2.002651               | 2.296741  | -0.240779 |
| 20               | 6                | 0              | 3.245174                | 2.738011  | 1.107321  |
| 21               | 6                | 0              | -1.720293               | 3.693269  | -0.131241 |
| 22               | 6                | 0              | -1.737788               | 4.293810  | 1.156433  |
| 23               | 6                | 0              | 2.407723                | 1.617414  | 1.292150  |
| 24               | 6                | 0              | 1.507989                | -3.237221 | 0.800143  |
| 25               | 6                | 0              | 4.478217                | 2.595759  | 0.498842  |
| 26               | 6                | 0              | -2.793793               | -1.927235 | -0.553105 |
| 27               | 6                | 0              | -2.304728               | 2.167107  | 2.169477  |
| 28               | 6                | 0              | -4.143533               | -2.293923 | 0.071911  |
| 29               | 6                | 0              | -1.716278               | 2.426256  | -2.652258 |
| 30               | 6                | 0              | -2.024238               | 3.545054  | 2.282839  |
| 31               | 6                | 0              | 0.746521                | -3.662619 | -0.465865 |
| 32               | 6                | 0              | -1.633007               | -2.793190 | -0.035942 |
| 33               | 6                | 0              | 5.734896                | -1.240416 | -0.804990 |
| 34               | 6                | 0              | -1.435350               | 3.804901  | -2.549061 |
| 35               | 6                | 0              | 6.579866                | -0.126489 | -0.996149 |
| 36               | 6                | 0              | 6.184056                | 1.130172  | -0.577652 |
| 37               | 6                | 0              | -1.437179               | 4.427083  | -1.314512 |
| 38               | 6                | 0              | -0.383553               | -2.725238 | -0.926972 |
| 39               | 6                | 0              | -6.410440               | -1.633888 | 0.302067  |
| 40               | 1                | 0              | -1.995617               | -3.826672 | -0.006172 |
| 41               | 1                | 0              | 0.330370                | -4.660935 | -0.269815 |
| 42               | 1                | 0              | -1.218145               | 4.375001  | -3.447203 |
| 43               | 1                | 0              | -0.009612               | -1.695035 | -0.986486 |
| 44               | 1                | 0              | -7.004670               | -0.771991 | 0.000866  |
| 45               | 1                | 0              | 7.544791                | -0.263267 | -1.474953 |
| 46               | 1                | 0              | 0.828148                | -2.993310 | 1.615525  |
| 47               | 1                | 0              | 1.470425                | -3.787458 | -1.278867 |
| 48               | 1                | 0              | -2.530215               | 1.578770  | 3.052955  |
| 49               | 1                | 0              | 6.835432                | 1.987942  | -0.724578 |
| 50               | 1                | 0              | -6.397768               | -1.731514 | 1.390080  |
| 51               | 1                | 0              | 5.123122                | 3.459230  | 0.356881  |
| 52               | 1                | 0              | 2.162653                | -4.049174 | 1.121480  |
| 53               | 1                | 0              | 6.045662                | -2.226846 | -1.133401 |
| 54               | 1                | 0              | 2.913780                | 3.714716  | 1.446939  |
| 55               | 1                | 0              | -2.914737               | -2.111357 | -1.625674 |
| 56               | 1                | 0              | -1.715520               | 1.938021  | -3.621247 |
| 57               | 1                | 0              | -1.522927               | 5.355797  | 1.243599  |
| 58               | 1                | 0              | -1.397499               | -2.506042 | 0.992668  |
| 59               | 1                | 0              | 1.439450                | 1.729919  | 1.768664  |
| 60               | 1                | 0              | -0.663534               | -3.008536 | -1.950502 |
| 61               | 1                | 0              | -1.222291               | 5.489726  | -1.235204 |
| 62               | 1                | 0              | -2.035276               | 4.014398  | 3.261880  |
| 63               | 1                | 0              | -6.801083               | -2.548406 | -0.150196 |

SCF Done: E(RB3LYP) = -1756.81454236 A.U. after 1 cycles  
 Zero-point correction= 0.493253 (Hartree/Particle)  
 Thermal correction to Energy= 0.524865  
 Thermal correction to Enthalpy= 0.525809



|                                              |              |
|----------------------------------------------|--------------|
| Thermal correction to Gibbs Free Energy=     | 0.427295     |
| Sum of electronic and zero-point Energies=   | -1756.321290 |
| Sum of electronic and thermal Energies=      | -1756.289678 |
| Sum of electronic and thermal Enthalpies=    | -1756.288734 |
| Sum of electronic and thermal Free Energies= | -1756.387248 |

L-LyMebNI (excited state (solvent=methanol) in Table S7) LysMebNI2RMeOH.tdoptpcmh.out  
 Standard orientation:

| Center<br>Number | Atomic<br>Number | Atomic<br>Type | Coordinates (Angstroms) |           |           |
|------------------|------------------|----------------|-------------------------|-----------|-----------|
|                  |                  |                | X                       | Y         | Z         |
| 1                | 6                | 0              | -3.799923               | -0.542181 | -2.182516 |
| 2                | 6                | 0              | -4.090318               | -1.101147 | -0.925280 |
| 3                | 6                | 0              | -3.625340               | -0.487104 | 0.263339  |
| 4                | 6                | 0              | -2.830690               | 0.698568  | 0.156886  |
| 5                | 6                | 0              | -2.518675               | 1.224107  | -1.120779 |
| 6                | 6                | 0              | -3.015746               | 0.602884  | -2.283393 |
| 7                | 6                | 0              | -3.902427               | -1.004805 | 1.551095  |
| 8                | 6                | 0              | -3.440151               | -0.346917 | 2.703865  |
| 9                | 6                | 0              | -2.683146               | 0.816194  | 2.597851  |
| 10               | 6                | 0              | -2.367198               | 1.340629  | 1.328930  |
| 11               | 6                | 0              | -1.552686               | 2.567186  | 1.226831  |
| 12               | 7                | 0              | -1.202419               | 3.006223  | -0.055118 |
| 13               | 6                | 0              | -1.663342               | 2.421006  | -1.243353 |
| 14               | 6                | 0              | -0.257984               | 4.145738  | -0.150560 |
| 15               | 6                | 0              | 1.181801                | 3.750474  | 0.222755  |
| 16               | 6                | 0              | 1.726240                | 2.552717  | -0.569464 |
| 17               | 6                | 0              | 3.005072                | 1.964447  | 0.044195  |
| 18               | 6                | 0              | 3.342251                | 0.564304  | -0.505307 |
| 19               | 6                | 0              | 4.643475                | 0.005730  | 0.070543  |
| 20               | 8                | 0              | 4.768639                | -1.310537 | -0.155196 |
| 21               | 8                | 0              | 5.508608                | 0.689024  | 0.588140  |
| 22               | 7                | 0              | 2.223670                | -0.390518 | -0.365585 |
| 23               | 6                | 0              | 1.567273                | -0.808354 | -1.538845 |
| 24               | 6                | 0              | 0.398101                | -1.675310 | -1.372031 |
| 25               | 6                | 0              | -0.025322               | -2.060518 | -0.072785 |
| 26               | 6                | 0              | 0.687904                | -1.638337 | 1.077742  |
| 27               | 6                | 0              | 1.879016                | -0.799979 | 0.930673  |
| 28               | 6                | 0              | -0.302974               | -2.127988 | -2.511223 |
| 29               | 6                | 0              | -1.421188               | -2.942718 | -2.364019 |
| 30               | 6                | 0              | -1.875307               | -3.312040 | -1.086775 |
| 31               | 6                | 0              | -1.183750               | -2.894058 | 0.078243  |
| 32               | 6                | 0              | -1.595801               | -3.253323 | 1.385312  |
| 33               | 6                | 0              | -0.868275               | -2.832116 | 2.510355  |
| 34               | 6                | 0              | 0.263052                | -2.035061 | 2.364797  |
| 35               | 8                | 0              | -1.350927               | 2.885109  | -2.344375 |
| 36               | 8                | 0              | -1.172036               | 3.185716  | 2.225583  |
| 37               | 8                | 0              | 1.971098                | -0.435869 | -2.651264 |
| 38               | 8                | 0              | 2.579459                | -0.442647 | 1.890542  |
| 39               | 1                | 0              | 0.046631                | -1.832770 | -3.494176 |
| 40               | 1                | 0              | -1.954477               | -3.292140 | -3.243154 |
| 41               | 1                | 0              | -2.738728               | -3.963353 | -0.984475 |
| 42               | 1                | 0              | -2.463180               | -3.895810 | 1.508106  |
| 43               | 1                | 0              | -1.193886               | -3.132555 | 3.501923  |
| 44               | 1                | 0              | 0.830825                | -1.708477 | 3.229090  |
| 45               | 1                | 0              | -2.324907               | 1.330828  | 3.482465  |
| 46               | 1                | 0              | -3.676591               | -0.751893 | 3.682624  |
| 47               | 1                | 0              | -4.511338               | -1.898943 | 1.644585  |
| 48               | 1                | 0              | -4.714412               | -1.986913 | -0.856487 |
| 49               | 1                | 0              | -4.184583               | -1.015659 | -3.079976 |
| 50               | 1                | 0              | -2.777047               | 1.031269  | -3.250246 |
| 51               | 6                | 0              | 5.993632                | -1.930780 | 0.295131  |
| 52               | 1                | 0              | -0.618150               | 4.930821  | 0.517637  |
| 53               | 1                | 0              | -0.315463               | 4.503385  | -1.177555 |
| 54               | 1                | 0              | 1.813081                | 4.635542  | 0.067658  |
| 55               | 1                | 0              | 1.216878                | 3.523390  | 1.294213  |
| 56               | 1                | 0              | 1.900147                | 2.834814  | -1.616324 |
| 57               | 1                | 0              | 0.957507                | 1.772298  | -0.583643 |
| 58               | 1                | 0              | 2.902046                | 1.902011  | 1.131711  |
| 59               | 1                | 0              | 3.863091                | 2.614270  | -0.158250 |
| 60               | 1                | 0              | 3.503750                | 0.636637  | -1.585743 |
| 61               | 1                | 0              | 6.095399                | -1.818488 | 1.377075  |
| 62               | 1                | 0              | 6.851887                | -1.479988 | -0.208653 |
| 63               | 1                | 0              | 5.898612                | -2.982074 | 0.025805  |

SCF Done: E(RB3LYP) = -1756.79950182 A.U. after 1 cycles  
 Zero-point correction= 0.490035 (Hartree/Particle)  
 Thermal correction to Energy= 0.521589  
 Thermal correction to Enthalpy= 0.522533

|                                              |              |
|----------------------------------------------|--------------|
| Thermal correction to Gibbs Free Energy=     | 0.428361     |
| Sum of electronic and zero-point Energies=   | -1756.214170 |
| Sum of electronic and thermal Energies=      | -1756.182616 |
| Sum of electronic and thermal Enthalpies=    | -1756.181672 |
| Sum of electronic and thermal Free Energies= | -1756.275844 |

L-LyMebNI (conformational isomer, ground state (solvent=methanol) in Table S7)  
 LysMebNImeOH2pcmh.out

Standard orientation:

| Center<br>Number | Atomic<br>Number | Atomic<br>Type | Coordinates (Angstroms) |           |           |
|------------------|------------------|----------------|-------------------------|-----------|-----------|
|                  |                  |                | X                       | Y         | Z         |
| 1                | 6                | 0              | 4.576897                | 3.285002  | 1.092476  |
| 2                | 6                | 0              | 5.704763                | 2.549752  | 1.405847  |
| 3                | 6                | 0              | 5.911519                | 1.261696  | 0.842853  |
| 4                | 6                | 0              | 4.929115                | 0.739420  | -0.054053 |
| 5                | 6                | 0              | 3.778576                | 1.509979  | -0.362273 |
| 6                | 6                | 0              | 3.610671                | 2.764795  | 0.205284  |
| 7                | 6                | 0              | 7.056927                | 0.472922  | 1.134290  |
| 8                | 6                | 0              | 7.220296                | -0.774627 | 0.561578  |
| 9                | 6                | 0              | 6.247545                | -1.285115 | -0.324201 |
| 10               | 6                | 0              | 5.115921                | -0.543266 | -0.630133 |
| 11               | 6                | 0              | 4.103427                | -1.089699 | -1.560468 |
| 12               | 7                | 0              | 2.965716                | -0.308665 | -1.811493 |
| 13               | 6                | 0              | 2.755394                | 0.979166  | -1.291552 |
| 14               | 6                | 0              | 1.957688                | -0.866247 | -2.743121 |
| 15               | 6                | 0              | 1.029999                | -1.907311 | -2.100092 |
| 16               | 6                | 0              | 0.123086                | -1.365217 | -0.985811 |
| 17               | 6                | 0              | -0.778667               | -2.474617 | -0.428105 |
| 18               | 6                | 0              | -1.733306               | -2.129661 | 0.730050  |
| 19               | 6                | 0              | -1.041673               | -1.874532 | 2.069809  |
| 20               | 8                | 0              | -1.923913               | -1.516852 | 3.016364  |
| 21               | 8                | 0              | 0.133964                | -2.100446 | 2.288519  |
| 22               | 7                | 0              | -2.728882               | -1.084584 | 0.398652  |
| 23               | 6                | 0              | -3.971942               | -1.529747 | -0.091997 |
| 24               | 6                | 0              | -4.968901               | -0.496686 | -0.441415 |
| 25               | 6                | 0              | -4.660041               | 0.877203  | -0.269529 |
| 26               | 6                | 0              | -3.397942               | 1.279135  | 0.238055  |
| 27               | 6                | 0              | -2.386656               | 0.263158  | 0.594066  |
| 28               | 6                | 0              | -6.208187               | -0.874827 | -0.938719 |
| 29               | 6                | 0              | -7.170910               | 0.099341  | -1.276503 |
| 30               | 6                | 0              | -6.889722               | 1.443464  | -1.116487 |
| 31               | 6                | 0              | -5.631544               | 1.867851  | -0.610984 |
| 32               | 6                | 0              | -5.301133               | 3.237976  | -0.430617 |
| 33               | 6                | 0              | -4.064894               | 3.608278  | 0.065323  |
| 34               | 6                | 0              | -3.109136               | 2.626606  | 0.401212  |
| 35               | 8                | 0              | 1.755418                | 1.624580  | -1.605764 |
| 36               | 8                | 0              | 4.230306                | -2.186495 | -2.106393 |
| 37               | 8                | 0              | -4.191493               | -2.733958 | -0.218545 |
| 38               | 8                | 0              | -1.282009               | 0.551628  | 1.050599  |
| 39               | 1                | 0              | -6.428373               | -1.929731 | -1.065047 |
| 40               | 1                | 0              | -8.135518               | -0.214055 | -1.664011 |
| 41               | 1                | 0              | -7.631659               | 2.193929  | -1.376717 |
| 42               | 1                | 0              | -6.037475               | 3.994617  | -0.689159 |
| 43               | 1                | 0              | -3.822610               | 4.658201  | 0.198697  |
| 44               | 1                | 0              | -2.138449               | 2.916534  | 0.789841  |
| 45               | 1                | 0              | 6.375362                | -2.264452 | -0.773672 |
| 46               | 1                | 0              | 8.099320                | -1.369419 | 0.790970  |
| 47               | 1                | 0              | 7.806375                | 0.866363  | 1.816389  |
| 48               | 1                | 0              | 6.449286                | 2.950497  | 2.088965  |
| 49               | 1                | 0              | 4.428084                | 4.268326  | 1.528338  |
| 50               | 1                | 0              | 2.725230                | 3.341816  | -0.040383 |
| 51               | 6                | 0              | -1.398018               | -1.306863 | 4.345168  |
| 52               | 1                | 0              | 2.506174                | -1.320871 | -3.570294 |
| 53               | 1                | 0              | 1.384931                | -0.020080 | -3.122045 |
| 54               | 1                | 0              | 0.410057                | -2.316821 | -2.910589 |
| 55               | 1                | 0              | 1.633064                | -2.740803 | -1.719577 |
| 56               | 1                | 0              | -0.487373               | -0.546369 | -1.385149 |
| 57               | 1                | 0              | 0.729902                | -0.942441 | -0.179085 |
| 58               | 1                | 0              | -0.157082               | -3.307816 | -0.077659 |
| 59               | 1                | 0              | -1.402131               | -2.874898 | -1.237863 |
| 60               | 1                | 0              | -2.339191               | -3.024943 | 0.902629  |
| 61               | 1                | 0              | -0.649116               | -0.511414 | 4.330753  |
| 62               | 1                | 0              | -0.954267               | -2.229777 | 4.725937  |
| 63               | 1                | 0              | -2.255459               | -1.015275 | 4.950666  |

SCF Done: E(RB3LYP) = -1756.81290623 A.U. after 1 cycles  
 Zero-point correction= 0.493144 (Hartree/Particle)  
 Thermal correction to Energy= 0.524814

|                                              |              |
|----------------------------------------------|--------------|
| Thermal correction to Enthalpy=              | 0.525758     |
| Thermal correction to Gibbs Free Energy=     | 0.426322     |
| Sum of electronic and zero-point Energies=   | -1756.319762 |
| Sum of electronic and thermal Energies=      | -1756.288093 |
| Sum of electronic and thermal Enthalpies=    | -1756.287148 |
| Sum of electronic and thermal Free Energies= | -1756.386584 |

L-LyMebNI (conformational isomer, excited state (solvent=methanol) in Table S7)  
 LysMebNImeOH2Rtdoptpcmh.out

Standard orientation:

| Center<br>Number | Atomic<br>Number | Atomic<br>Type | Coordinates (Angstroms) |           |           |
|------------------|------------------|----------------|-------------------------|-----------|-----------|
|                  |                  |                | X                       | Y         | Z         |
| 1                | 6                | 0              | 4.608948                | 3.276489  | 1.068190  |
| 2                | 6                | 0              | 5.735038                | 2.537303  | 1.378678  |
| 3                | 6                | 0              | 5.932080                | 1.245369  | 0.821128  |
| 4                | 6                | 0              | 4.941816                | 0.723379  | -0.067267 |
| 5                | 6                | 0              | 3.793351                | 1.498088  | -0.372795 |
| 6                | 6                | 0              | 3.635001                | 2.756594  | 0.189288  |
| 7                | 6                | 0              | 7.075243                | 0.452412  | 1.109947  |
| 8                | 6                | 0              | 7.229055                | -0.798887 | 0.542780  |
| 9                | 6                | 0              | 6.248554                | -1.309112 | -0.334562 |
| 10               | 6                | 0              | 5.118824                | -0.563220 | -0.637657 |
| 11               | 6                | 0              | 4.098013                | -1.109517 | -1.558920 |
| 12               | 7                | 0              | 2.962511                | -0.324328 | -1.806918 |
| 13               | 6                | 0              | 2.762186                | 0.967665  | -1.293441 |
| 14               | 6                | 0              | 1.945510                | -0.882551 | -2.728333 |
| 15               | 6                | 0              | 1.017236                | -1.914764 | -2.072052 |
| 16               | 6                | 0              | 0.114255                | -1.359634 | -0.960872 |
| 17               | 6                | 0              | -0.781091               | -2.463862 | -0.383266 |
| 18               | 6                | 0              | -1.736697               | -2.101934 | 0.768697  |
| 19               | 6                | 0              | -1.044887               | -1.818032 | 2.102241  |
| 20               | 8                | 0              | -1.928805               | -1.451992 | 3.044572  |
| 21               | 8                | 0              | 0.132095                | -2.034810 | 2.324433  |
| 22               | 7                | 0              | -2.734843               | -1.067317 | 0.417751  |
| 23               | 6                | 0              | -3.969914               | -1.523116 | -0.070844 |
| 24               | 6                | 0              | -4.959948               | -0.512179 | -0.436283 |
| 25               | 6                | 0              | -4.664046               | 0.864348  | -0.284534 |
| 26               | 6                | 0              | -3.407617               | 1.275331  | 0.221797  |
| 27               | 6                | 0              | -2.402648               | 0.279851  | 0.591815  |
| 28               | 6                | 0              | -6.234244               | -0.926849 | -0.948745 |
| 29               | 6                | 0              | -7.172341               | 0.025930  | -1.293685 |
| 30               | 6                | 0              | -6.890893               | 1.409010  | -1.147135 |
| 31               | 6                | 0              | -5.643556               | 1.848752  | -0.644711 |
| 32               | 6                | 0              | -5.318629               | 3.216161  | -0.480858 |
| 33               | 6                | 0              | -4.054693               | 3.611656  | 0.028800  |
| 34               | 6                | 0              | -3.108001               | 2.669209  | 0.378252  |
| 35               | 8                | 0              | 1.763879                | 1.616598  | -1.605646 |
| 36               | 8                | 0              | 4.216404                | -2.209700 | -2.099962 |
| 37               | 8                | 0              | -4.198913               | -2.741809 | -0.186238 |
| 38               | 8                | 0              | -1.292996               | 0.600011  | 1.053789  |
| 39               | 1                | 0              | -6.433300               | -1.986513 | -1.055271 |
| 40               | 1                | 0              | -8.139261               | -0.277811 | -1.683172 |
| 41               | 1                | 0              | -7.641742               | 2.143663  | -1.424256 |
| 42               | 1                | 0              | -6.050581               | 3.972648  | -0.750214 |
| 43               | 1                | 0              | -3.838101               | 4.669533  | 0.141666  |
| 44               | 1                | 0              | -2.137988               | 2.953238  | 0.768477  |
| 45               | 1                | 0              | 6.368797                | -2.291426 | -0.779608 |
| 46               | 1                | 0              | 8.106438                | -1.396871 | 0.770142  |
| 47               | 1                | 0              | 7.830578                | 0.845642  | 1.785648  |
| 48               | 1                | 0              | 6.485551                | 2.937759  | 2.055388  |
| 49               | 1                | 0              | 4.467487                | 4.262699  | 1.499965  |
| 50               | 1                | 0              | 2.750963                | 3.336705  | -0.054093 |
| 51               | 6                | 0              | -1.402685               | -1.220262 | 4.369242  |
| 52               | 1                | 0              | 2.486257                | -1.345207 | -3.556152 |
| 53               | 1                | 0              | 1.374514                | -0.035942 | -3.108918 |
| 54               | 1                | 0              | 0.394103                | -2.331511 | -2.876423 |
| 55               | 1                | 0              | 1.619849                | -2.745545 | -1.684881 |
| 56               | 1                | 0              | -0.501592               | -0.548917 | -1.368537 |
| 57               | 1                | 0              | 0.723015                | -0.922765 | -0.163190 |
| 58               | 1                | 0              | -0.155335               | -3.287865 | -0.018545 |
| 59               | 1                | 0              | -1.403390               | -2.881162 | -1.185324 |
| 60               | 1                | 0              | -2.340173               | -2.995956 | 0.957141  |
| 61               | 1                | 0              | -0.658160               | -0.420997 | 4.342813  |
| 62               | 1                | 0              | -0.953327               | -2.135195 | 4.762718  |
| 63               | 1                | 0              | -2.260920               | -0.924835 | 4.971841  |

SCF Done: E(RB3LYP) = -1756.80634937 A.U. after 1 cycles  
 Zero-point correction= 0.489449 (Hartree/Particle)  
 Thermal correction to Energy= 0.521569

|                                              |              |
|----------------------------------------------|--------------|
| Thermal correction to Enthalpy=              | 0.522513     |
| Thermal correction to Gibbs Free Energy=     | 0.422572     |
| Sum of electronic and zero-point Energies=   | -1756.203129 |
| Sum of electronic and thermal Energies=      | -1756.171009 |
| Sum of electronic and thermal Enthalpies=    | -1756.170065 |
| Sum of electronic and thermal Free Energies= | -1756.270006 |

### 13. References

- S1 CrysAlisPro Data Collection and Processing Software, Rigaku Corporation, Japan (2015).
- S2. SHELXL 97, Sheldrick, G. M. University of Göttingen, Germany (1997).
- S3. Dolomanov, O. V., Bourhis, L. J., Gildea, R. J., Howard, J. A. K., Puschmann, H.: *J. Appl. Cryst.* **42**, 339–341 (2009).
- S4. Bourhis, L. J., Dolomanov, O. V., Gildea, R. J., Howard, J. A. K., Puschmann, H.: *Acta Cryst.* **A71**, 59–75 (2015).
- S5. Gaussian 16, Revision C.01, Frisch, M. J., Trucks, G. W., Schlegel, H. B., Scuseria, G. E., Robb, M. A., Cheeseman, J. R., Scalmani, G., Barone, V., Petersson, G. A., Nakatsuji, H., Li, X., Caricato, M., Marenich, A., Bloino, J., Janesko, B. G., Gomperts, R., Mennucci, B., Hratchian, H. P., Ortiz, J. V., Izmaylov, A. F., Sonnenberg, J. L., Williams-Young, D., Ding, F., Lipparini, F., Egidi, F., Goings, J., Peng, B., Petrone, A., Henderson, T., Ranasinghe, D., Zakrzewski, V. G., Gao, J., Rega, N., Zheng, G., Liang, W., Hada, M., Ehara, M., Toyota, K., Fukuda, R., Hasegawa, J., Ishida, M., Nakajima, T., Honda, Y., Kitao, O., Nakai, H., Vreven, T., Throssell, K., Montgomery, Jr., J. A., Peralta, J. E., Ogliaro, F., Bearpark, M., Heyd, J. J., Brothers, E., Kudin, K. N., Staroverov, V. N., Keith, T., Kobayashi, R., Normand, J., Raghavachari, K., Rendell, A., Burant, J. C., Iyengar, S. S., Tomasi, J., Cossi, M., Millam, J. M., Klene, M., Adamo, C., Cammi, R., Ochterski, J. W., Martin, R. L., Morokuma, K., Farkas, O., Foresman, J. B., Fox, D. J.: Gaussian, Inc., Wallingford CT (2016).
- S6. Becke, A. D.: *J. Chem. Phys.* **98**, 5648–5652 (1993).
- S7. Lee, C., Yang, W., Parr, R. G.: *Phys. Rev.* **B37**, 785–789 (1988).
- S8. Cancès, E., Mennucci, B., Tomasi, J.: *J. Chem. Phys.* **107**, 3032–3041 (1997).
- S9. Cossi, M., Barone, V., Mennucci, B., Tomasi, J.: *J. Chem. Phys. Lett.* **286**, 253–260 (1998).
- S10. Mennucci, B., Tomasi, J.: *J. Chem. Phys.* **106**, 5151–5158 (1997).
